# Supplementary material for: A multifunctional catenated host for the efficient binding of Eu3+ and Gd3+
Source: Royal Society of Chemistry journal article supplement (doi:10.1039/c9cc00090a), 2019-01-01
Supplement: c9cc00090a1.pdf [file c9cc00090a1.pdf]

## Supporting Information

for

### A multifunctional catenated host for efficient binding of $\text{Eu}^{3+}$ and $\text{Gd}^{3+}$

Mandira Nandi<sup>a</sup>, Somnath Bej<sup>a</sup>, Tamal Kanti Ghosh<sup>a</sup> and Pradyut Ghosh<sup>\*a</sup>

<sup>a</sup>*School of Chemical Sciences, Indian Association for the Cultivation of Science, 2A & 2B Raja S. C. Mullick Road, Kolkata 700032, India. E-mail: [icpg@iacs.res.in](mailto:icpg@iacs.res.in)*

---

#### TABLE OF CONTENTS

|                                                                                                                              |         |
|------------------------------------------------------------------------------------------------------------------------------|---------|
| 1. Materials and Methods.....                                                                                                | 2S      |
| 2. X-Ray crystallographic refinement details: .....                                                                          | 3S      |
| 3. Synthetic Scheme.....                                                                                                     | 4S-5S   |
| (i) Scheme S1                                                                                                                |         |
| (ii) Scheme S2                                                                                                               |         |
| (iii) Scheme S3                                                                                                              |         |
| (iv) Scheme S4                                                                                                               |         |
| 4. Inner transition metal ion ( $\text{Eu}^{3+}$ and $\text{Gd}^{3+}$ ) complexation with [2]catenane ( <b>Figure S1</b> ).. | 5S      |
| 5. General Procedure.....                                                                                                    | 6S-9S   |
| 6. Characterization of compound <b>1c</b> ( <b>Figure S1a-Figure S2</b> ).....                                               | 10S-11S |
| 7. Characterization of compound <b>1d</b> ( <b>Figure S3-Figure S4</b> ).....                                                | 11S-12S |
| 8. Characterization of <b>PhenMC</b> ( <b>Figure S5-Figure S7</b> ).....                                                     | 12S-13S |
| 9. Characterization of <b>Axle</b> ( <b>Figure S8-Figure S10</b> ).....                                                      | 14S-15S |
| 10. Crystallographic details of the <b>Axle</b> ( <b>Figure S11, Table 1S</b> ).....                                         | 15S-16S |
| 11. ESI-MS of [2]Pseudorotaxane ( <b>Figure S12</b> ) and metallated                                                         |         |

|                                                                                                                                                                                       |         |
|---------------------------------------------------------------------------------------------------------------------------------------------------------------------------------------|---------|
| [2]catenane ( <b>Figure S13</b> ).....                                                                                                                                                | 16S-17S |
| 12. Characterization of [2]catenane ( <b>Figure S14-Figure S21</b> ).....                                                                                                             | 17S-21S |
| 13. Crystallographic details of the Na-Catenate ( <b>Figure S22, Table 2S</b> ).....                                                                                                  | 21S-22S |
| 14. UV-Vis 1:1 titration profile, Molar ratio plot and Non-linear 1:1 curve fitting plot for the formation of CATN-Eu <sup>3+</sup> complex ( <b>Figure S23-Figure S25</b> )...       | 22S-23S |
| 15. Molar ratio plot and Non-linear 1:1 curve fitting plot for the formation of CATN-Gd <sup>3+</sup> complex from UV-Vis titration experiment ( <b>Figure S26-Figure S27</b> ).....  | 24S     |
| 16. Molar ratio plot and Non-linear 1:1 curve fitting plot for the formation of CATN-Eu <sup>3+</sup> complex from 1:1 PL titration experiment ( <b>Figure S28- Figure S29</b> )..... | 25S     |
| 17. Characterization of CATN-Eu <sup>3+</sup> and CATN-Gd <sup>3+</sup> complex ( <b>Figure S30-Figure S35</b> ).....                                                                 | 26S-28S |
| 18. Characterization of CATN-Y <sup>3+</sup> complex ( <b>Figure S36-Figure S41</b> ).....                                                                                            | 29S-32S |
| 19. Characterization of Na-catenate ( <b>Figure S42-Figure S44</b> ).....                                                                                                             | 33S-34S |
| 20. Comparative <sup>1</sup> H NMR analysis between (i) Y-catenate and (ii) [2]catenane in CD <sub>3</sub> CN (400 MHz) at 298 K ( <b>Figure S45</b> ).....                           | 34S     |
| 21. References.....                                                                                                                                                                   | 35S     |

## Materials and methods

All the reagents and deuterated solvents were purchased from Sigma- Aldrich and used as received. Solvents like THF, acetone, CH<sub>2</sub>Cl<sub>2</sub>, CHCl<sub>3</sub>, and CH<sub>3</sub>CN were distilled *via* usual procedure prior to use. Reactions were carried out under argon atmosphere and work up procedure was done at ambient conditions. In each case, column chromatography was performed by using 60-120 mesh silica gel which was purchased from Merck private limited. <sup>1</sup>H, <sup>13</sup>C, COSY and ROESY NMR spectroscopy experiments were carried out on a FT-NMR Bruker DPX 300/400/500 MHz NMR spectrometer and the residual protons of each

deuterated solvents were granted as the internal standards where the coupling constants were calculated in hertz (Hz) and chemical shifts in ppm. Electrospray ionization mass spectrometry (ESI-MS) analysis was performed with a Waters QtoF Model YA 263 spectrometer in positive ion ESI mode. The absorption studies and emission studies were recorded in a Perkin-Elmer Lambda 900 UV/Vis/NIR spectrometer (NIR = near-infrared) (with a quartz cuvette of path length 1cm) and PerkinElmer LS-55 spectrofluorimeter respectively. Fourier transform infrared (FT-IR) spectra were recorded on a SHIMADZU FTIR-8400S IR spectrophotometer with KBr pellets. Crystals were solved by using a Bruker SMART APEX diffractometer, equipped with a CCD area detector at 150 K. Compounds **1a**,<sup>1</sup> **1b**,<sup>1</sup> **2a**,<sup>2</sup> **2b**<sup>2</sup> and alkene iodide<sup>3</sup> were prepared by using the known procedure reported in literature. All the characterization data of the known compounds properly matched with the reported characterization details.

### **X-Ray crystallographic refinement details:**

Crystal data of **Axle** and **Na-Catenate** were obtained by using Mo- K $\alpha$  ( $\lambda=0.7107$  Å) radiation on a Bruker SMART APEX diffractometer, equipped with a CCD area detector. Data integration and reduction were processed by SAINT<sup>4</sup> software provided with the SMART APEX II software package. The structure was solved using SHELXTL<sup>5</sup> and was refined on F<sup>2</sup> by the full- matrix least-squares technique using the SHELXL-2014<sup>6</sup> program package. Empirical absorption correction to the collected reflections has been done by applying SADABS<sup>7</sup>. PLATON-97<sup>8</sup> and MERCURY 3.6<sup>9</sup> were used to generate graphics. Some disordered solvent molecules were removed by the PLATON/SQUEEZE program. In the crystal structures all non-hydrogen atoms were refined with anisotropic displacement coefficients and all hydrogen atoms were geometrically fixed at idealized positions. The CCDC no. of the crystal structures (1871206 and 1871207) contains the supplementary crystallographic data for this paper.

## Synthetic Scheme

**PhenMC:** Compound **1a** and **1b** were prepared by using the known procedure reported in literature. All the characterization data of the known compounds properly matched with the reported characterization details.

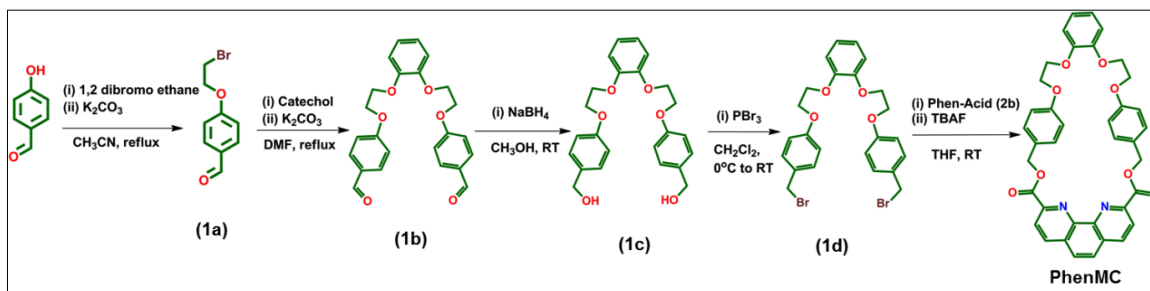

**Scheme S1:** Synthetic scheme of **PhenMC**

**Axle:** Compound **2a** and **2b** were prepared by using the known procedure reported in literature. All the characterization data of the known compounds properly matched with the reported characterization details.

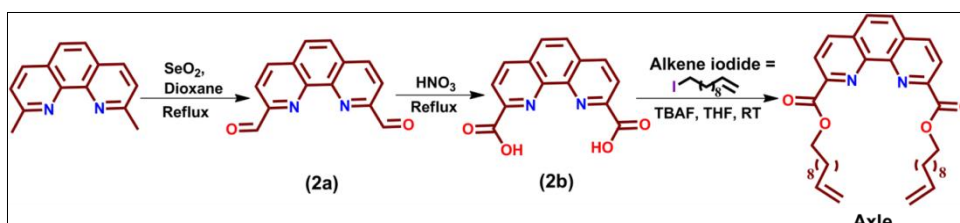

**Scheme S2:** Synthetic scheme of **Axle**

## [2]Catenane:

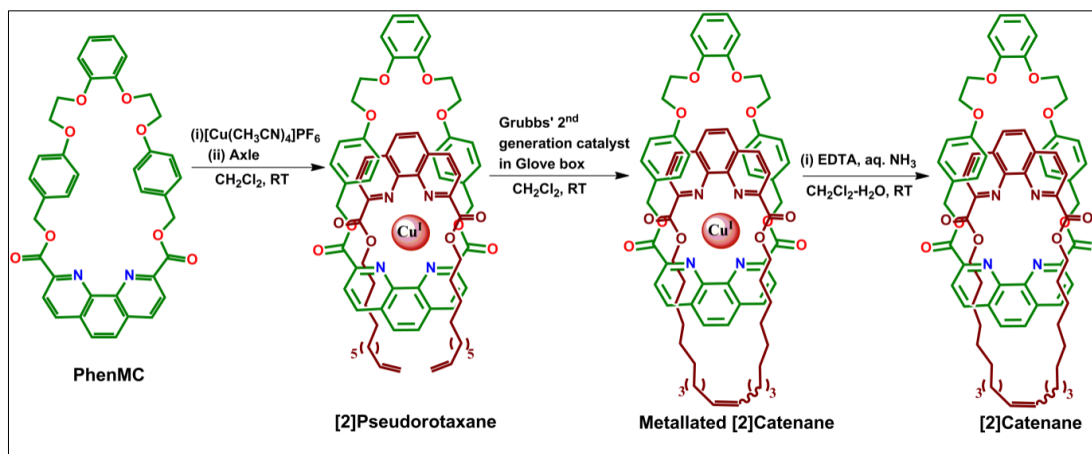

**Scheme S3:** Synthetic scheme of **[2]Catenane**

## Lanthanide binded [2]Catenane:

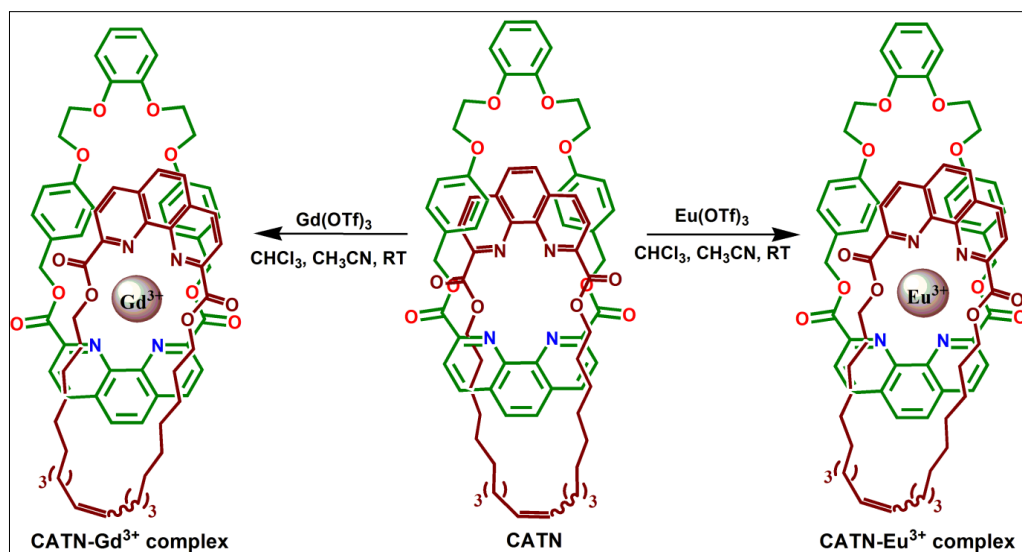

**Scheme S4:** Synthetic scheme of  $\text{CATN-Gd}^{3+}$  and  $\text{CATN-Eu}^{3+}$  complexes

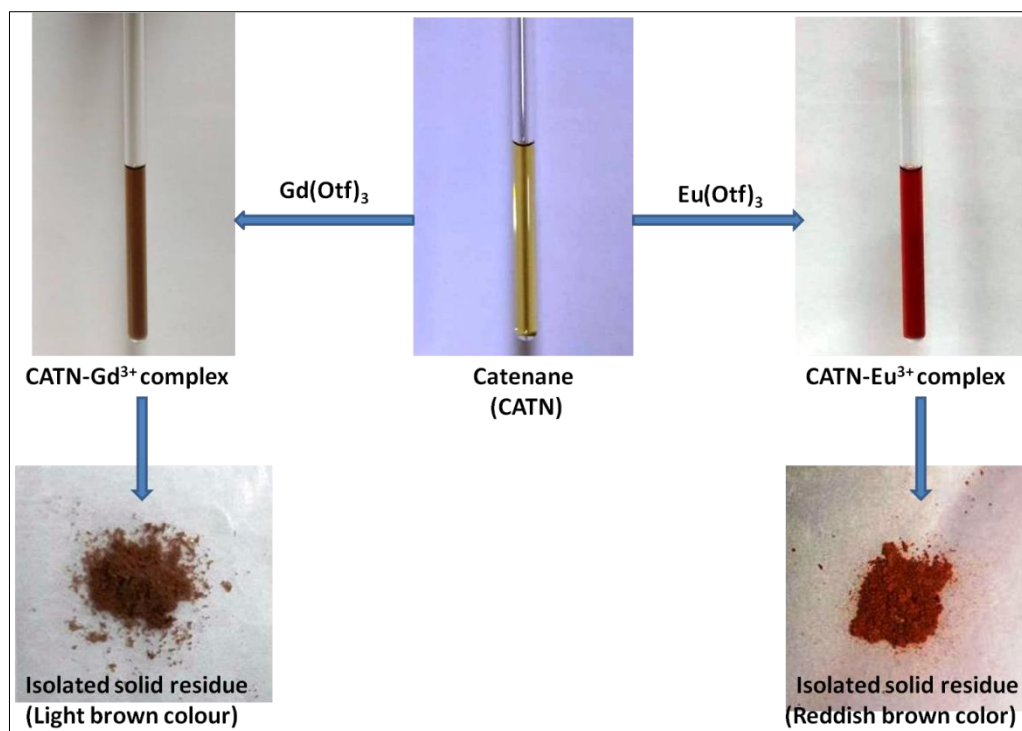

**Figure S1:** Progress of reaction between catenane with  $\text{Eu}^{3+}$  and  $\text{Gd}^{3+}$

## General Procedure:

**Synthesis of Compound 1c:** Compound **1b** (406 mg, 1mmol) was dissolved in CHCl<sub>3</sub>-CH<sub>3</sub>OH binary solvent mixture and reacted with NaBH<sub>4</sub> (151 mg, 4mmol) for 24h in room temperature. After that, the reaction mixture was evaporated to dryness and extracted with CHCl<sub>3</sub> and water by washing the organic layer several times with brine solution. Solid crystalline product was isolated as white solid (Scheme S1). Yield: 82%.

Compound **1c** (C<sub>24</sub>H<sub>26</sub>O<sub>6</sub>, M<sub>w</sub> = 410.46): HRMS (ESI-MS): C<sub>24</sub>H<sub>27</sub>O<sub>6</sub> [M + H]<sup>+</sup>: calcd, *m/z* 411.1808; found, *m/z* 411.1821. Anal. calcd for C<sub>24</sub>H<sub>26</sub>O<sub>6</sub>: C, 70.23; H, 6.38. Found C, 71.05; H, 6.55. <sup>1</sup>H NMR (500 MHz, CDCl<sub>3</sub>): δ (ppm) 4.30 (t, 4H, J = 5 Hz, -CH<sub>2</sub>), 4.36 (t, 4H, J = 4.5 Hz, -CH<sub>2</sub>), 4.58 (s, 4H, -CH<sub>2</sub>), 6.90 (d, 4H, J = 8.5 Hz, Ar-H), 6.95-7.00 (m, 4H, Ar-H), 7.22 (d, 4H, J = 8.5 Hz, Ar-H). <sup>13</sup>C NMR (100 MHz, CDCl<sub>3</sub>): δ (ppm) 65.15, 67.14, 68.49, 115.05, 115.83, 122.31, 128.78, 130.20, 133.66, 149.30, 158.61.

**Synthesis of Compound 1d:** Compound **1c** (410 mg, 1mmol) in dry CH<sub>2</sub>Cl<sub>2</sub> was purged with argon gas, then PBr<sub>3</sub> (570 μl, 6mmol) was added drop wise in the atmosphere of argon and the reaction mixture was stirred for 24h. The reaction mixture was quenched with sodium bicarbonate solution and stirred for another 6h. Thereafter, the reaction mixture was evaporated to dryness and extracted with CHCl<sub>3</sub> and water by washing the organic layer several times with brine solution. Solid crystalline product was isolated as yellowish white crystalline solid (scheme S1). Yield: 70%

Compound **1d** (C<sub>24</sub>H<sub>24</sub>Br<sub>2</sub>O<sub>4</sub>, M<sub>w</sub> = 536.25). Anal. calcd for C<sub>24</sub>H<sub>24</sub>Br<sub>2</sub>O<sub>4</sub>: C, 53.75; H, 4.51. Found C, 55.11; H, 4.23. <sup>1</sup>H NMR (400 MHz, CDCl<sub>3</sub>): δ (ppm) 4.30 (t, 4H, J = 5.2 Hz, -CH<sub>2</sub>), 4.36 (t, 4H, J = 4 Hz, -CH<sub>2</sub>), 4.48 (s, 4H, -CH<sub>2</sub>), 6.88 (d, 4H, J = 8.8 Hz, Ar-H), 6.94-7.00 (m, 4H, Ar-H), 7.29 (d, 4H, J = 8.8 Hz, Ar-H). <sup>13</sup>C NMR (100 MHz, CDCl<sub>3</sub>): δ (ppm) 33.98, 67.03, 68.40, 115.18, 115.91, 122.37, 130.50, 130.61, 149.23, 159.01.

**Synthesis of Compound PhenMC:** Compound **2b** (536 mg, 2mmol) was reacted with TBAF (1.044 g, 4mmol) in dry THF and stirred for 3h in the room temperature. Then the compound **1d** (3.204 g, 3mmol) in dry THF was added drop wise to the reaction mixture *via* pressure equalizer funnel and the reaction was stirred in room temperature for another 48h in the atmosphere of argon. Thereafter, the reaction mixture was evaporated to dryness and extracted with CHCl<sub>3</sub> and water by washing the organic layer several times with brine solution. Extracted yellowish semi-solid product was purified in column chromatography by

using 4:1 CHCl<sub>3</sub> and ethyl acetate as eluent mixture. Solid crystalline **PhenMC** was isolated as light yellow powder (Scheme S1). Yield: 66%

**PhenMC** (C<sub>38</sub>H<sub>30</sub>N<sub>2</sub>O<sub>8</sub>, M<sub>w</sub>=642.65). HRMS (ESI-MS): C<sub>38</sub>H<sub>30</sub>N<sub>2</sub>NaO<sub>8</sub> [M + Na]<sup>+</sup>: calcd, *m/z* 665.1900; found, *m/z* 665.1904. HRMS (ESI-MS): C<sub>38</sub>H<sub>31</sub>N<sub>2</sub>O<sub>8</sub> [M + H]<sup>+</sup>: calcd, *m/z* 643.2080; found, *m/z* 643.2081. Anal. calcd for C<sub>38</sub>H<sub>30</sub>N<sub>2</sub>O<sub>8</sub>: C, 71.02; H, 4.71; N, 4.36. Found C, 69.91; H, 4.43; N, 4.80. <sup>1</sup>H NMR (500 MHz, CDCl<sub>3</sub>): δ (ppm) 4.32 (s, 8H, -CH<sub>2</sub>), 5.56 (s, 4H, -CH<sub>2</sub>), 6.97 (t, 8H, J = 4 Hz, Ar-H), 7.52 (d, 4H, J = 8.5 Hz, Ar-H), 7.92 (s, 2H, Ar-H), 8.39 (d, 2H, J = 8.5 Hz, Ar-H), 8.49 (d, 2H, J = 8 Hz, Ar-H). <sup>13</sup>C NMR (100 MHz, CDCl<sub>3</sub>): δ (ppm) 67.26, 67.47, 68.86, 114.21, 115.15, 115.72, 116.29, 122.34, 124.12, 128.43, 130.71, 137.45, 139.44, 149.46, 159.23, 165.86, 170.54.

**Synthesis of Axle:** Compound **2b** (536 mg, 2mmol) was reacted with TBAF (1.044 g, 4mmol) in dry THF and stirred for 3h in the room temperature. Then alkene iodide (1.680 g, 3mmol) in dry THF was added to the reaction mixture *via* pressure equalizer funnel and the reaction was stirred in room temperature for another 48h in the atmosphere of argon. Thereafter, the reaction mixture was evaporated to dryness and extracted with CHCl<sub>3</sub> and water by washing the organic layer several times with brine solution. Extracted liquid product was purified in column chromatography by using 9:1 CHCl<sub>3</sub> and ethyl acetate as eluent mixture. Pure product was isolated as yellowish oil (Scheme S2). Yield: 74%

**Axle** (C<sub>36</sub>H<sub>48</sub>N<sub>2</sub>O<sub>4</sub>, M<sub>w</sub> = 572.77). HRMS (ESI-MS): C<sub>36</sub>H<sub>49</sub>N<sub>2</sub>O<sub>4</sub> [M + H]<sup>+</sup>: calcd, *m/z* 573.3692; found, *m/z* 573.3698. Anal. calcd for C<sub>36</sub>H<sub>48</sub>N<sub>2</sub>O<sub>4</sub>: C, 75.49; H, 8.45; N, 4.89. Found C, 76.33; H, 8.79; N, 5.53. <sup>1</sup>H NMR (500 MHz, CDCl<sub>3</sub>): δ (ppm) 1.28-1.33(m, 12H, -CH<sub>2</sub>), 1.36-1.39(m, 8H, -CH<sub>2</sub>), 1.45-1.50 (m, 4H, -CH<sub>2</sub>), 1.92-1.97 (m, 4H, -CH<sub>2</sub>), 2.01-2.05 (m, 4H, -CH<sub>2</sub>), 4.53(t, 4H, J = 7 Hz, -CH<sub>2</sub>), 4.91-5.00 (m, 4H, -CH<sub>2</sub>), 5.76-5.83 (m, 2H, -CH), 7.94 (s, 2H, Ar-H), 8.41-8.46 (m, 4H, Ar-H). <sup>13</sup>C NMR (100 MHz, CDCl<sub>3</sub>): δ (ppm) 26.06, 28.76-29.82, 33.92, 66.75, 114.24, 123.99, 128.36, 130.78, 137.53, 139.33, 145.87, 148.75, 165.59.

**Synthesis of [2]Pseudorotaxane:** In the solution of **PhenMC** (128 mg, 0.2mmol) in dry CH<sub>2</sub>Cl<sub>2</sub>, [Cu(CH<sub>3</sub>CN)<sub>4</sub>]PF<sub>6</sub> (74 mg, 0.2mmol) was added in the atmosphere of argon and the reaction mixture was stirred for 6h in the room temperature. Thereafter **Axle** (114 mg, 0.2mmol) in dry CH<sub>2</sub>Cl<sub>2</sub> was added to the **PhenMC-Cu<sup>I</sup>** complex in the argon atmosphere and stirred for another 24h. Then the reaction mixture was evaporated to dryness and purple coloured crystalline solid was isolated as [2]pseudorotaxane (Scheme S3). Yield: 82%.

[2]Pseudorotaxane ( $C_{74}H_{78}CuF_6N_4O_{12}P$ ,  $M_w = 1423.94$ ). HRMS (ESI-MS):  $C_{74}H_{78}CuN_4O_{12}$   $[M-PF_6]^-$ : calcd,  $m/z$  1277.4912; found,  $m/z$  1277.4911. Anal. calcd for  $C_{74}H_{78}CuF_6N_4O_{12}P$ : C, 62.42; H, 5.52; N, 3.93. Found C, 64.01; H, 5.12; N, 3.72.

**Synthesis of [2]Catenane:** In the glove box, [2]Pseudorotaxane (200 mg, 0.15 mmol) was dissolved in dry  $CH_2Cl_2$  and then catalytic amount of Grubb's 2<sup>nd</sup> generation catalyst was added to this as a solid. The reaction mixture was stirred for 36h in the glove box to obtain **metallated [2] catenane**. Saturated solution of  $Na_2EDTA$  and aq.  $NH_3$  were added to the crude residue and stirred for 48h. Then the reaction mixture was extracted with  $CHCl_3$  and water by washing the organic layer with the brine solution. Organic layer was evaporated to obtain red coloured solid residue. The resulting solid was purified by silica column chromatography by using 24:1  $CHCl_3$  and  $CH_3CN$  respectively as eluent and by several times washing with diethyl ether, white coloured solid [2]Catenane (**CATN**) was obtained (Scheme S3). Yield: 16%

**Metallated [2]catenane** ( $C_{72}H_{74}CuF_6N_4O_{12}P$ ,  $M_w=1395.89$ ). HRMS (ESI-MS):  $C_{72}H_{74}CuN_4O_{12}$   $[M-PF_6]^-$ : calcd,  $m/z$  1249.4599; found,  $m/z$  1249.4602. Anal. calcd for  $C_{72}H_{74}CuF_6N_4O_{12}P$ : C, 61.95; H, 5.34; N, 4.01. Found C, 63.05; H, 5.03; N, 3.67.

**[2]catenane** ( $C_{72}H_{74}N_4O_{12}$ ,  $M_w = 1187.38$ ): HRMS (ESI-MS):  $C_{72}H_{74}N_4NaO_{12}$   $[M + Na]^+$ : calcd,  $m/z$  1209.5201; found, 1209.5208. Anal. calcd for  $C_{72}H_{74}N_4O_{12}$ : C, 72.83; H, 6.28; N, 4.72. Found C, 71.26; H, 6.05; N, 4.97. Characteristic  $\lambda_{max} = 280$  nm in ( $2 \times 10^{-5}$ ) M  $CH_3CN$  and molar extinction coefficient ( $\epsilon$ ) value in =  $2.2 \times 10^4$   $M^{-1} cm^{-1}$ .  $^1H$  NMR (500 MHz,  $CDCl_3$ ):  $\delta$  (ppm) 1.11-1.43(m, 28H,  $-CH_2$ ), 2.04 (s, 4H,  $-CH_2$ ), 3.95 (s, 4H,  $-CH_2$ ), 4.05 (s, 4H,  $-CH_2$ ), 4.39 (s, 4H,  $-CH_2$ ), 4.95 (s, 4H,  $-CH_2$ ), 5.55 (s, 2H,  $-CH$ ), 5.69 (d, 4H,  $J = 8$  Hz, Ar-H), 6.07 (d, 4H,  $J = 8$  Hz, Ar-H), 7.04 (s, 4H, Ar-H), 8.26 (d, 4H,  $J = 7$  Hz, Ar-H), 8.32 (d, 2H,  $J = 8$  Hz, Ar-H), 8.57 (d, 2H,  $J = 8.5$  Hz, Ar-H), 8.71 (d, 2H,  $J = 7$  Hz, Ar-H), 8.97 (d, 2H,  $J = 8$  Hz, Ar-H).  $^{13}C$  NMR (100 MHz,  $CDCl_3$ ):  $\delta$  (ppm) 25.88, 28.94-33.94, 65.98, 66.35, 67.15, 67.61, 111.74, 112.51, 114.19, 121.30, 123.37, 124.67, 126.24, 127.03, 129.24, 130.69, 131.23, 131.48, 138.92, 139.45, 144.57, 145.22, 145.71, 146.85, 148.32, 156.34, 164.62, 165.00. IR (KBr,  $\nu$   $cm^{-1}$ ): 559.32, 721.33, 842.83, 943.13, 1060.78, 1130.21, 1157.21, 1247.86, 1377.08, 1454.23, 1508.23, 1614.31, 1728.10, 2852.52, 2923.88, 3433.06.

**Synthesis of CATN-Eu<sup>3+</sup> complex:**  $Eu(OTf)_3$  (30 mg, 0.05 mmol) was added to the  $CH_3CN/CHCl_3$  binary solvent mixture of **CATN** (50 mg, 0.042 mmol). The reaction mixture was stirred vigorously for 24h. By overnight stirring the solution mixture was turned into reddish



brown color from the light yellow color and the color persisted even after evaporation. The crude solid was washed several times with chloroform and diethylether to obtain reddish brown colored solid Eu-catenate (Scheme S4). Yield: 59%

**CATN-Eu<sup>3+</sup> complex** (C<sub>75</sub>H<sub>74</sub>F<sub>9</sub>EuN<sub>4</sub>O<sub>21</sub>S<sub>3</sub>, M<sub>w</sub>=1786.54). Anal. calcd for C<sub>75</sub>H<sub>74</sub>F<sub>9</sub>EuN<sub>4</sub>O<sub>21</sub>S<sub>3</sub>: C, 50.42; H, 4.17; N, 3.14. Found C, 49.43; H, 4.02; N, 3.18. HRMS (ESI-MS): C<sub>74</sub>H<sub>76</sub>EuF<sub>6</sub>N<sub>4</sub>O<sub>19</sub>S<sub>2</sub> [M - CF<sub>3</sub>SO<sub>3</sub><sup>-</sup> + H<sub>2</sub>O]<sup>+</sup>: calcd, *m/z* 1655.3651; found *m/z* 1655.3649. Characteristic λ<sub>max</sub> = 294 nm in (2 × 10<sup>-5</sup>) M CH<sub>3</sub>CN and molar extinction coefficient value (ε) = 2.35 × 10<sup>4</sup> M<sup>-1</sup> cm<sup>-1</sup>. Characteristic Eu<sup>3+</sup> centered emission peaks at 589, 614, 651 and 697 nm in (2 × 10<sup>-5</sup>) M CH<sub>3</sub>CN. Characteristic absorption maxima and emission peaks (Fig. S34a, S34b, ESI†) of the isolated **CATN-Eu<sup>3+</sup>** complex matched well with the corresponding peak values obtained from the UV/Vis and PL titration data respectively, which suggested the formation of 1:1 Eu-catenate complex in the solution state. <sup>1</sup>H NMR (500 MHz, CD<sub>3</sub>CN): δ (ppm) 1.28-1.50 (m), 1.60 (d), 1.76 (d), 1.87-1.89 (m), 2.10-2.19 (m), 2.32 (s), 3.08-3.11 (m), 4.23-4.42 (m), 4.61 (s), 5.56 (bs), 6.90-7.04 (m), 7.08 (s), 7.23 (bs), 7.30-7.33 (m), 7.71-7.87 (m), 8.13 (s), 8.27-8.45 (m), 8.76 (bs), 9.18 (bs), 9.79 (bs). IR (KBr, ν cm<sup>-1</sup>): 395.38, 516.89, 642.25, 719.40, 815.83, 875.62, 1031.85, 1172.64, 1251.72, 1400.22, 1434.94, 1467.73, 1510.16, 1589.95, 1627.81, 2927.74, 3436.91.

Synthesis of **CATN-Gd<sup>3+</sup>** complex: Gd(OTf)<sub>3</sub> (30 mg, 0.05 mmol) was added to the CH<sub>3</sub>CN/CHCl<sub>3</sub> binary solvent mixture of **CATN** (50 mg, 0.042 mmol). The reaction mixture was stirred vigorously for 24h. By overnight stirring the solution mixture was turned into light brown color from the light yellow color and the color persisted even after evaporation. The crude solid was washed several times with chloroform and diethylether to obtain light brown colored solid Gd-catenate (Scheme S4). Yield: 48%

**CATN-Gd<sup>3+</sup> complex** (C<sub>75</sub>H<sub>74</sub>F<sub>9</sub>GdN<sub>4</sub>O<sub>21</sub>S<sub>3</sub>, M<sub>w</sub>=1791.83). Anal. calcd for C<sub>75</sub>H<sub>74</sub>F<sub>9</sub>GdN<sub>4</sub>O<sub>21</sub>S<sub>3</sub>: C, 50.27; H, 4.16; N, 3.13. Found C, 49.37; H, 4.33; N, 3.07. HRMS (ESI-MS): C<sub>74</sub>H<sub>76</sub>F<sub>6</sub>GdN<sub>4</sub>O<sub>19</sub>S<sub>2</sub> [M - CF<sub>3</sub>SO<sub>3</sub><sup>-</sup> + H<sub>2</sub>O]<sup>+</sup>: calcd, *m/z* 1660.3679; found, 1660.3682. Characteristic λ<sub>max</sub> = 298 nm in (2 × 10<sup>-5</sup>) M CH<sub>3</sub>CN and molar extinction coefficient value (ε) = 2.25 × 10<sup>4</sup> M<sup>-1</sup> cm<sup>-1</sup>. Characteristic absorption maxima at λ<sub>max</sub> = 298 nm (Fig. S35, ESI†) of the isolated **CATN-Gd<sup>3+</sup>** complex matched well with the λ<sub>max</sub> value obtained from the UV/Vis titration data, which suggested the formation of 1:1 Gd-catenate complex in the solution state. <sup>1</sup>H NMR (500 MHz, CD<sub>3</sub>CN): δ (ppm) 7.01, 5.89, 4.90, 4.25, 3.09, 2.32, 1.97, 1.63, 1.29, -0.68. IR (KBr, ν cm<sup>-1</sup>): 433.95, 636.47, 715.54, 1031.85, 1170.71, 1253.64, 1384.79, 1465.80, 1569.95, 1625.88, 2554.45, 2923.88, 3431.13.

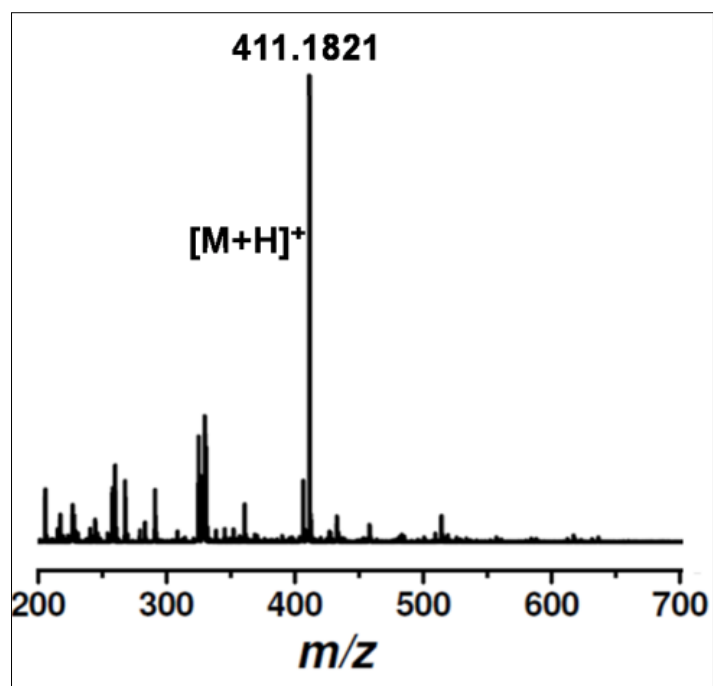

**Figure S1a:** ESI-MS (+ve) spectrum of Compound **1c**

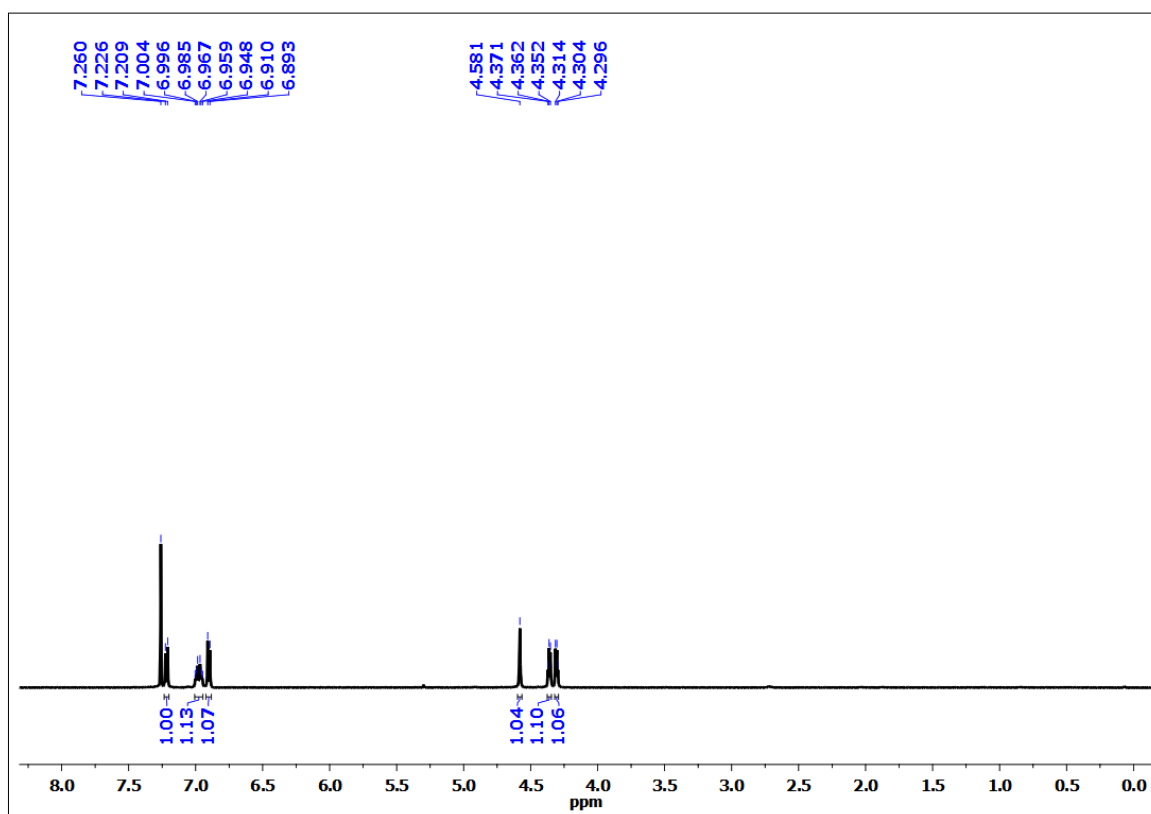

**Figure S1b:**  $^1\text{H}$  NMR spectrum of Compound **1c** in  $\text{CDCl}_3$  (500 MHz) at 298 K

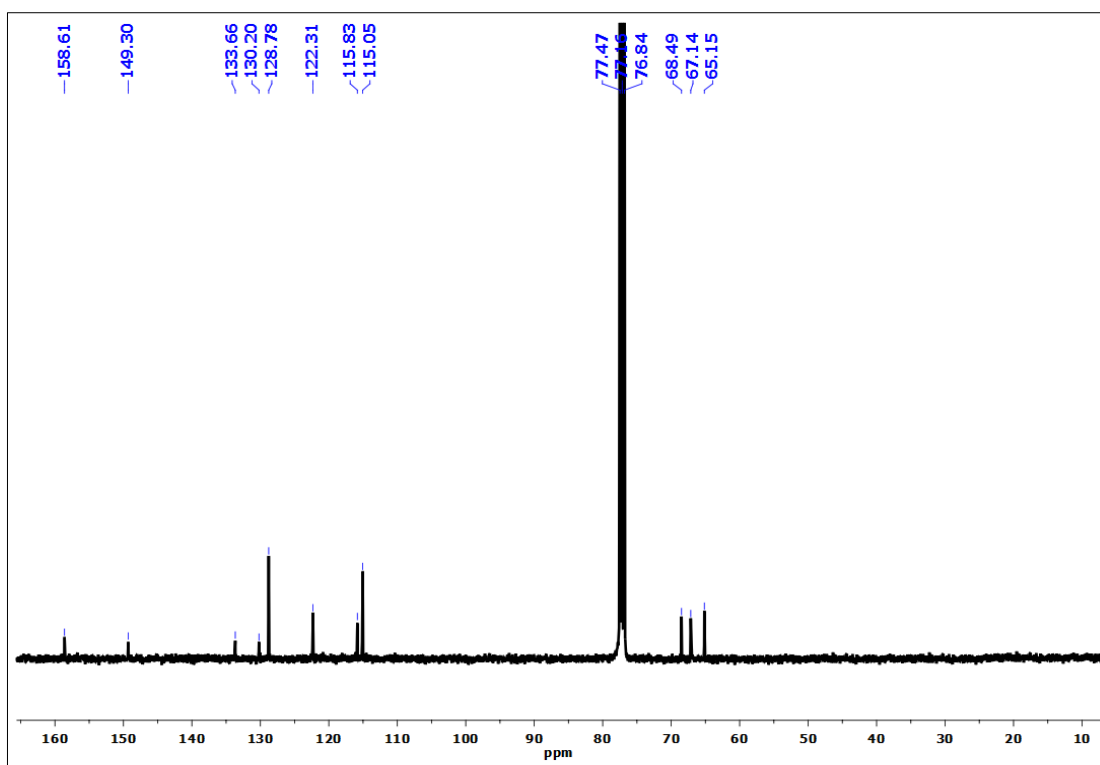

**Figure S2:** <sup>13</sup>C NMR spectrum of Compound **1c** in CDCl<sub>3</sub> (100 MHz) at 298 K

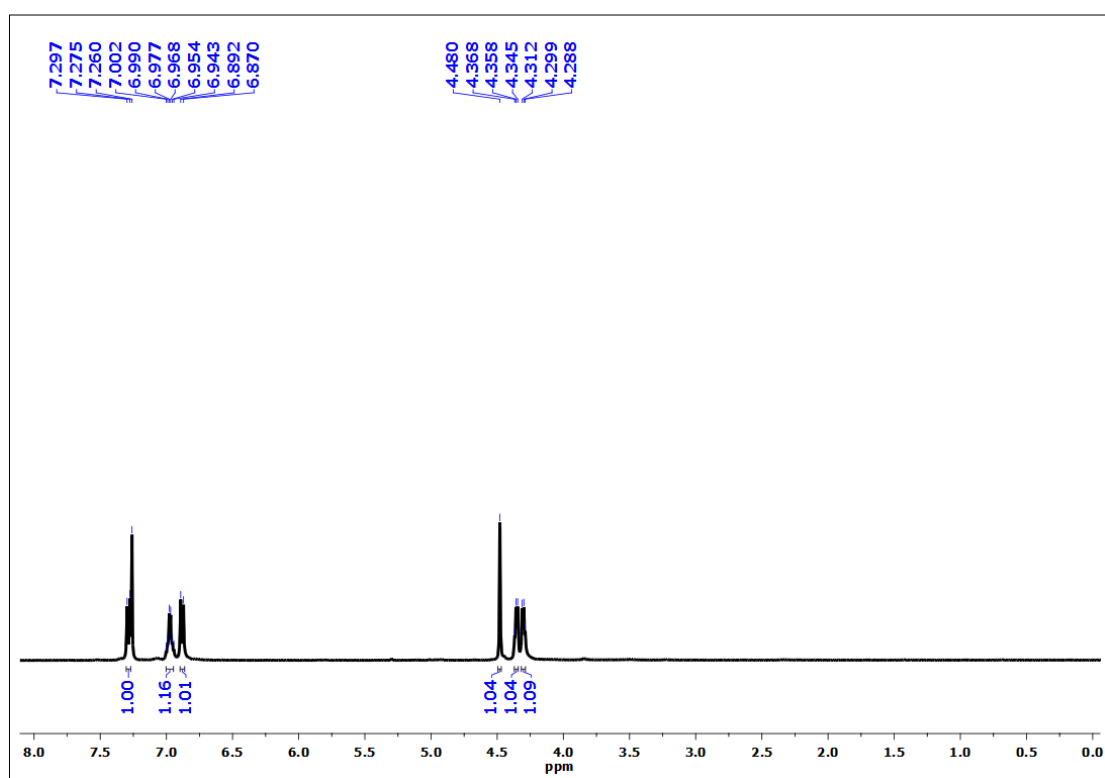

**Figure S3:** <sup>1</sup>H NMR spectrum of Compound **1d** in CDCl<sub>3</sub> (400 MHz) at 298 K

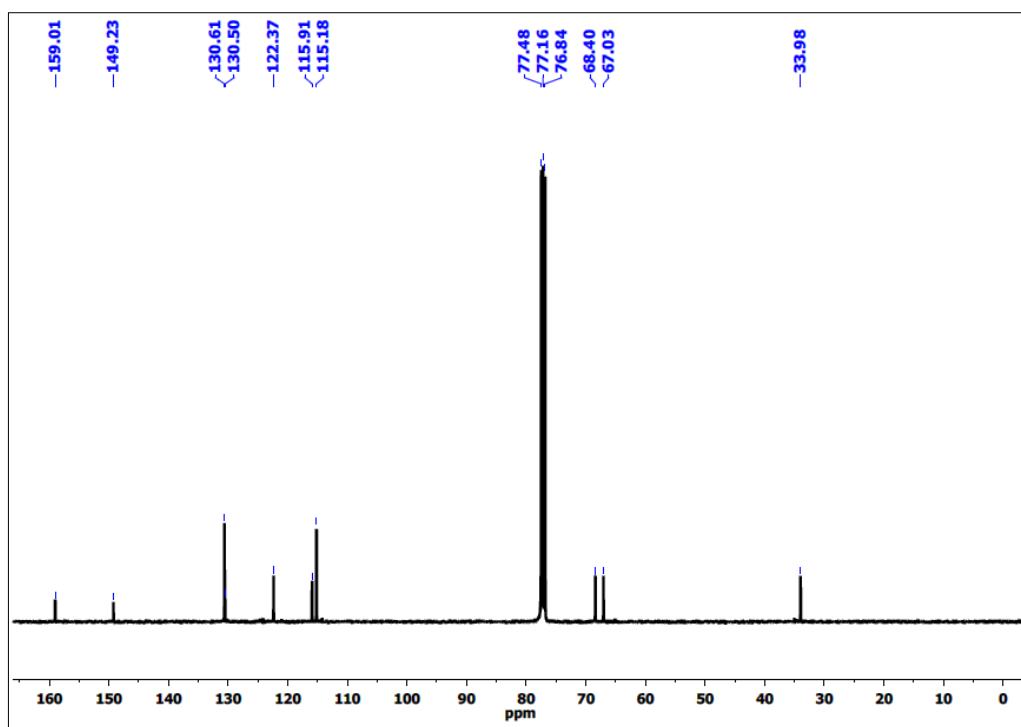

**Figure S4:**  $^{13}\text{C}$  NMR spectrum of Compound **1d** in  $\text{CDCl}_3$  (100 MHz) at 298 K

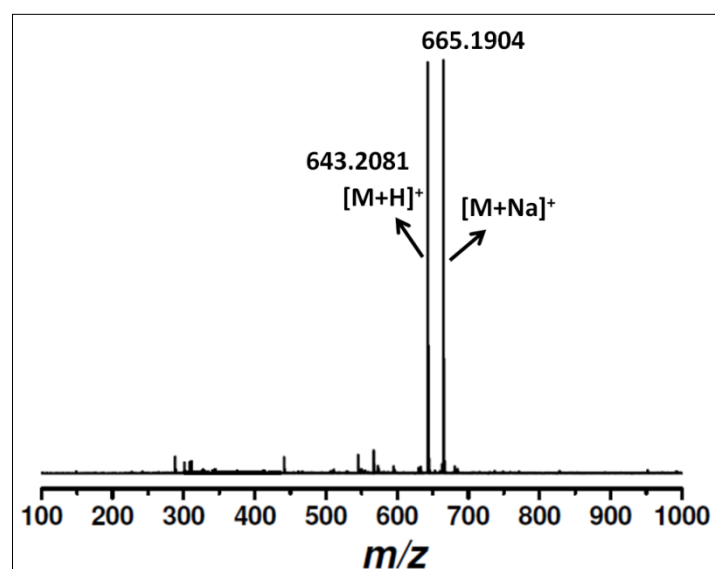

**Figure S5:** ESI-MS (+ve) spectrum of **PhenMC**

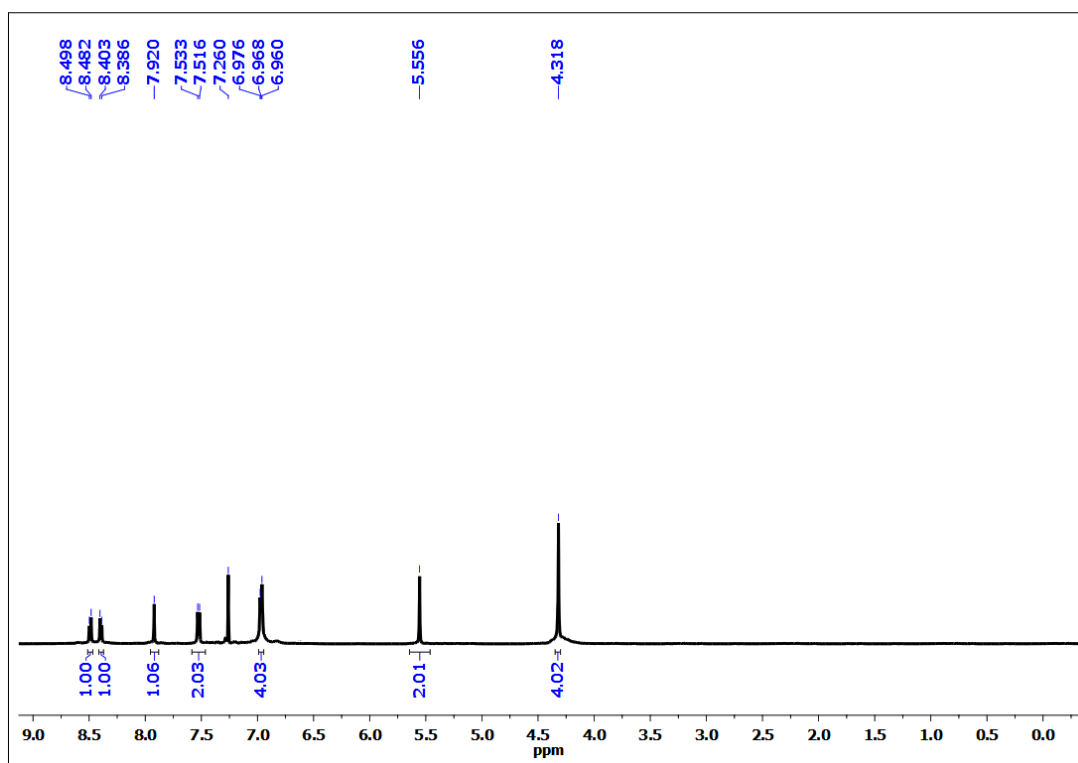

**Figure S6:** <sup>1</sup>H NMR spectrum of **PhenMC** in CDCl<sub>3</sub> (500 MHz) at 298 K

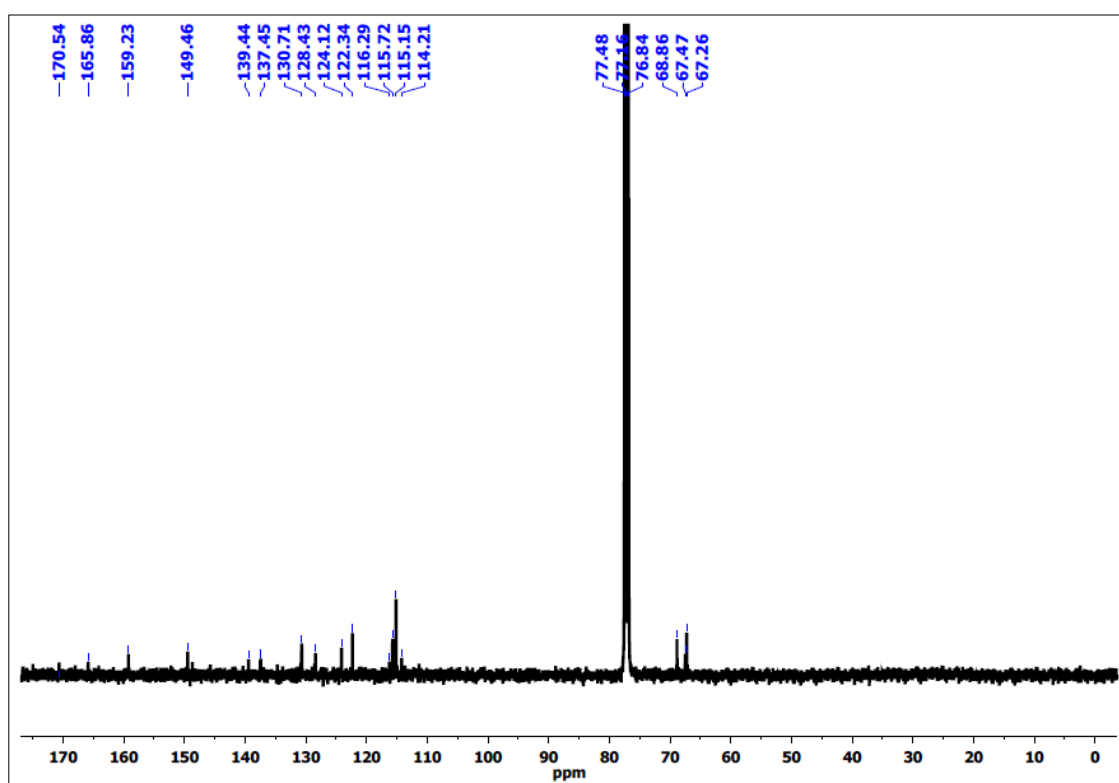

**Figure S7:** <sup>13</sup>C NMR spectrum of **PhenMC** in CDCl<sub>3</sub> (100 MHz) at 298 K

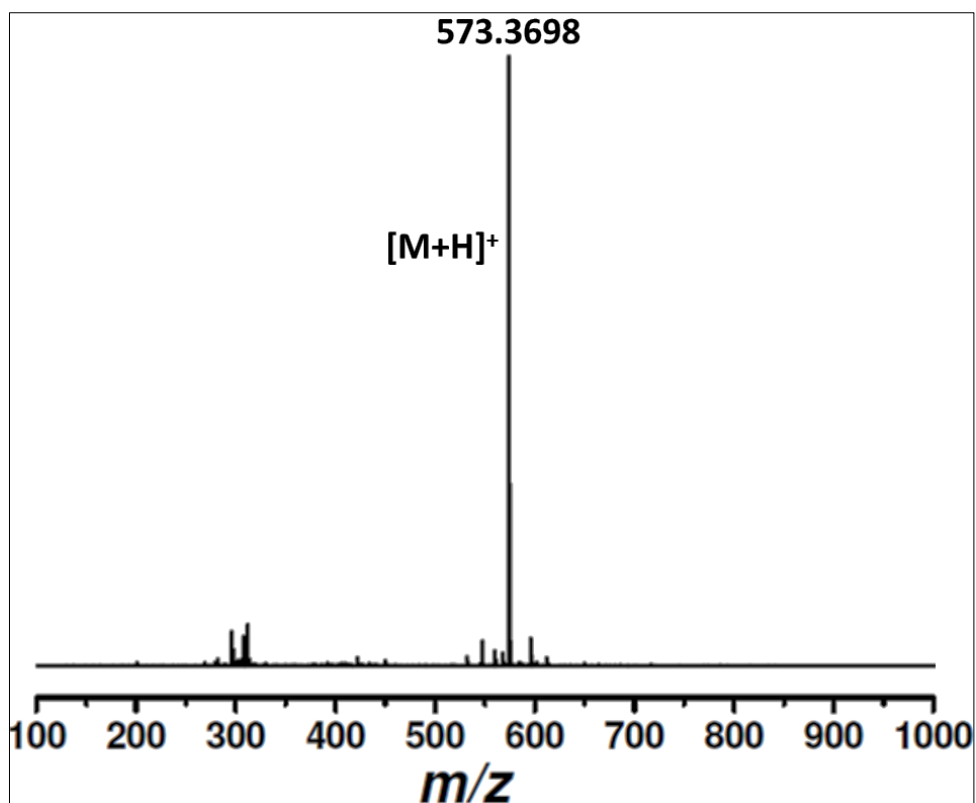

**Figure S8:** ESI-MS (+ve) spectrum of Axle

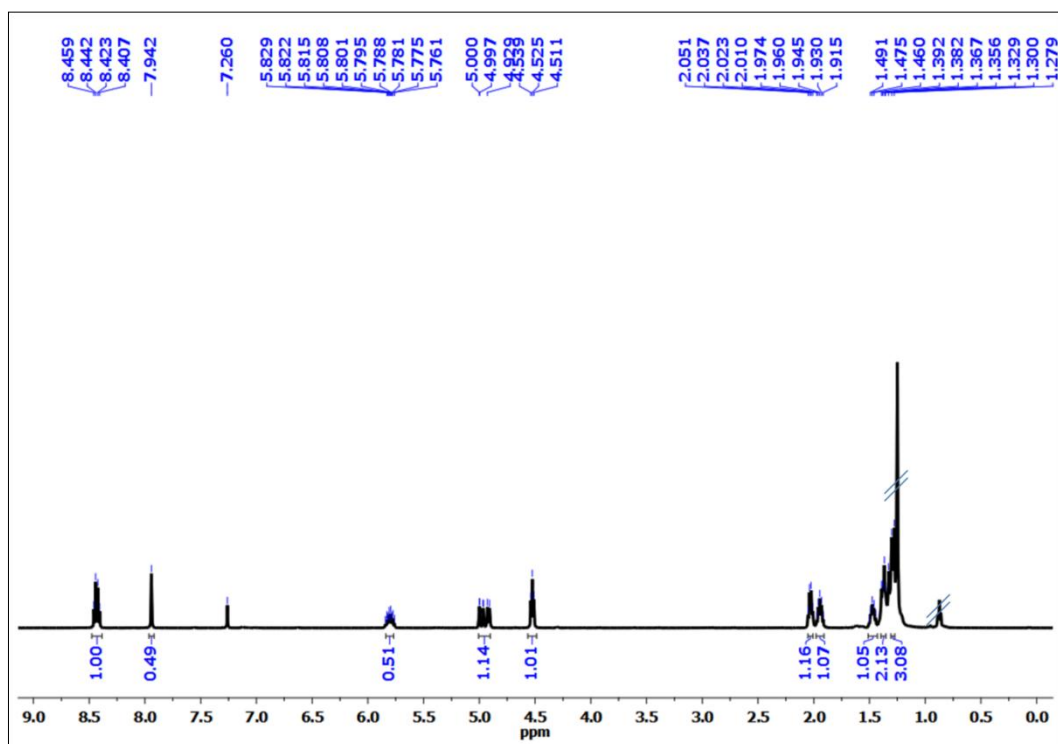

**Figure S9:**  $^1\text{H}$  NMR spectrum of Axle in  $\text{CDCl}_3$  (500 MHz) at 298 K

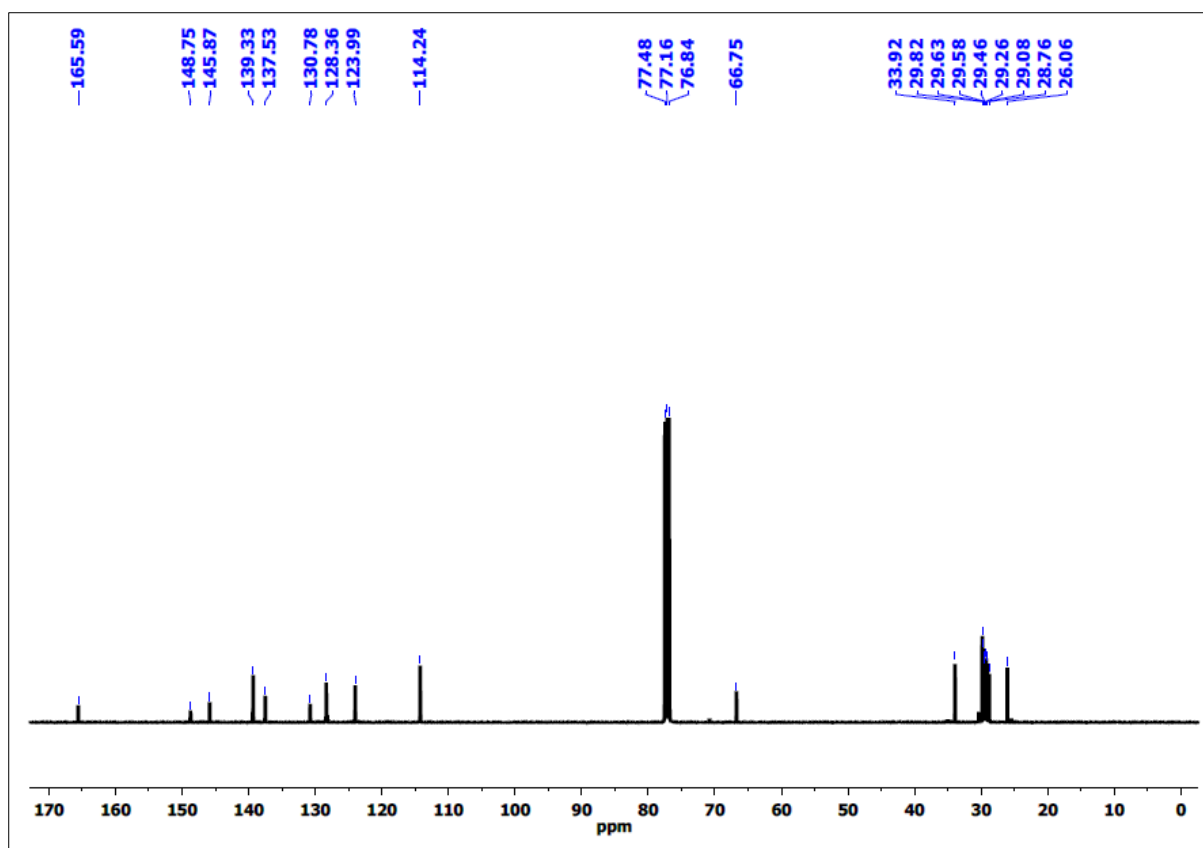

**Figure S10:**  $^{13}\text{C}$  NMR spectrum of **Axle** in  $\text{CDCl}_3$  (100 MHz) at 298 K

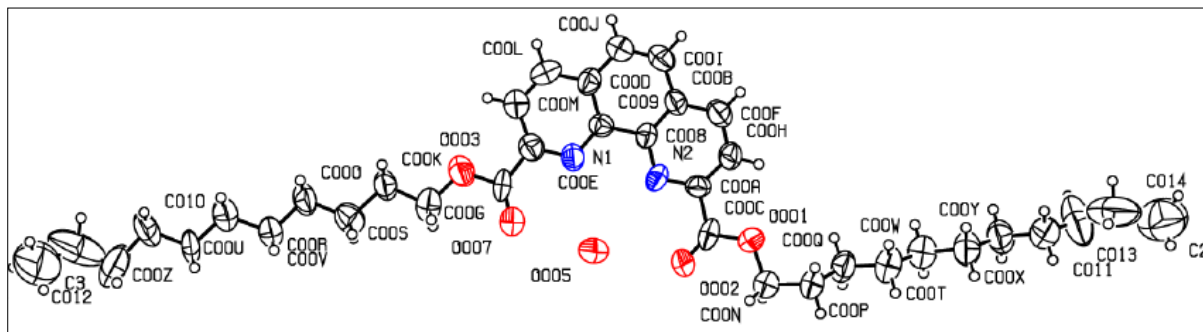

**Figure S11:** Single Crystal X-ray structure of **Axle** (ellipsoid model using platon version)

Table 1S: Crystallographic details of **Axle**

|                                                                               |                                                               |
|-------------------------------------------------------------------------------|---------------------------------------------------------------|
| Compound reference                                                            | AXLE                                                          |
| Chemical formula                                                              | C <sub>36</sub> H <sub>48</sub> N <sub>2</sub> O <sub>5</sub> |
| Formula Mass                                                                  | 588.76                                                        |
| Crystal system                                                                | Monoclinic                                                    |
| <i>a</i> /Å                                                                   | 15.881(7)                                                     |
| <i>b</i> /Å                                                                   | 17.389(7)                                                     |
| <i>c</i> /Å                                                                   | 13.796(6)                                                     |
| $\alpha$ /°                                                                   | 90                                                            |
| $\beta$ /°                                                                    | 114.134(13)                                                   |
| $\gamma$ /°                                                                   | 90                                                            |
| Unit cell volume/Å <sup>3</sup>                                               | 3477(3)                                                       |
| Temperature/K                                                                 | 150(2)                                                        |
| Space group                                                                   | <i>P</i> 2 <sub>1</sub> / <i>c</i>                            |
| No. of formula units per unit cell, <i>Z</i>                                  | 4                                                             |
| No. of reflections measured                                                   | 21382                                                         |
| No. of independent reflections                                                | 2721                                                          |
| <i>R</i> <sub>int</sub>                                                       | 0.1034                                                        |
| Final <i>R</i> <sub>I</sub> values ( <i>I</i> > 2σ( <i>I</i> ))               | 0.0642                                                        |
| Final <i>wR</i> ( <i>F</i> <sup>2</sup> ) values ( <i>I</i> > 2σ( <i>I</i> )) | 0.1317                                                        |
| Final <i>R</i> <sub>I</sub> values (all data)                                 | 0.1173                                                        |
| Final <i>wR</i> ( <i>F</i> <sup>2</sup> ) values (all data)                   | 0.1463                                                        |
| Goodness of fit on <i>F</i> <sup>2</sup>                                      | 1.579                                                         |
| CCDC number                                                                   | 1871206                                                       |

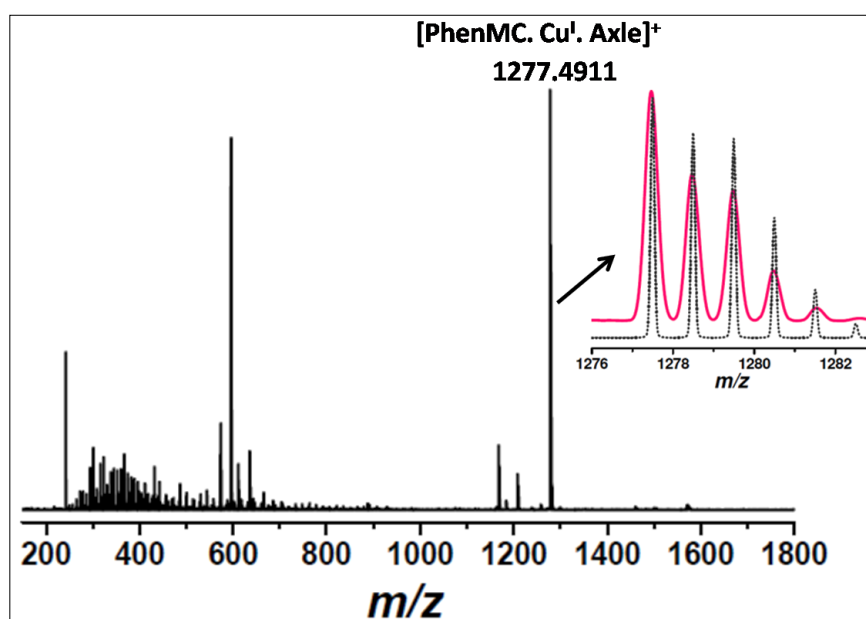

**Figure S12:** ESI-MS (+ve) spectrum of **[2]Pseudorotaxane** with the isotopic distribution pattern given in inset



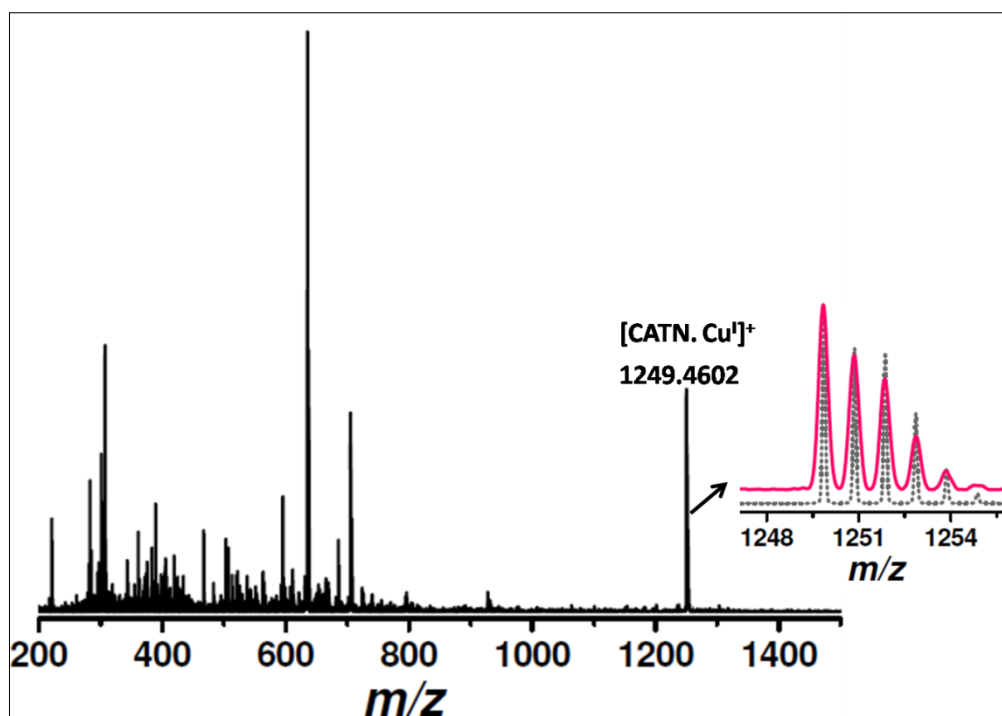

**Figure S13:** ESI-MS (+ve) spectrum of metallated [2]Catenane with the isotopic distribution pattern given in inset

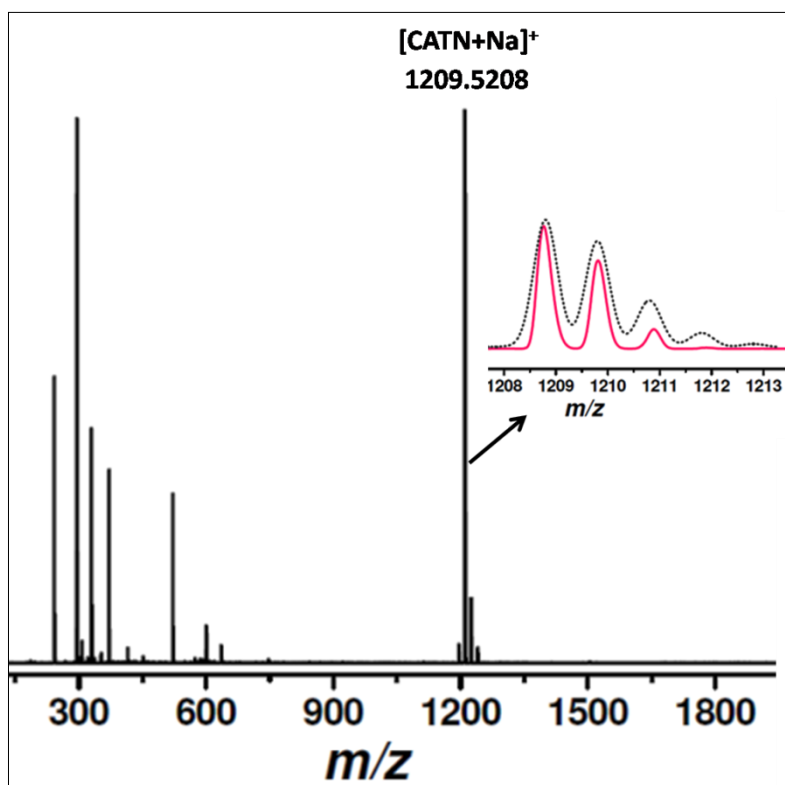

**Figure S14:** ESI-MS (+ve) spectrum of [2]Catenane with the isotopic distribution pattern given in inset

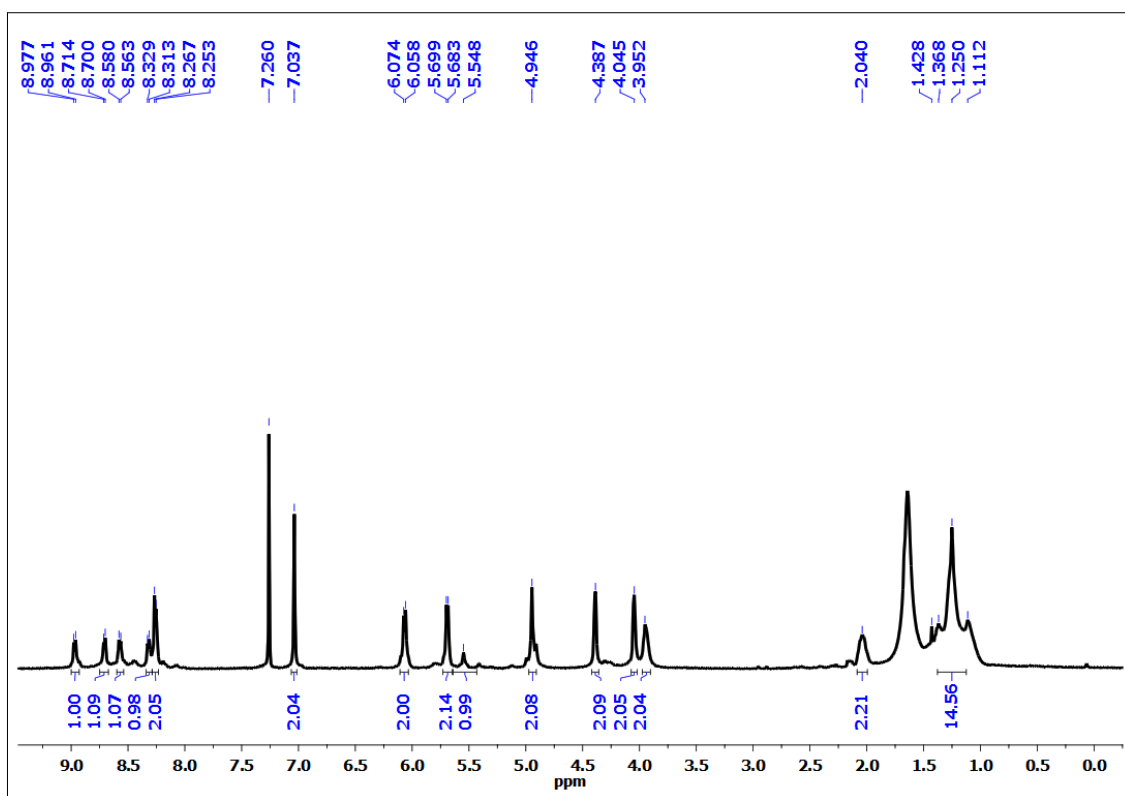

**Figure S15:** <sup>1</sup>H NMR spectrum of [2]Catenane in CDCl<sub>3</sub> (500MHz) at 298 K

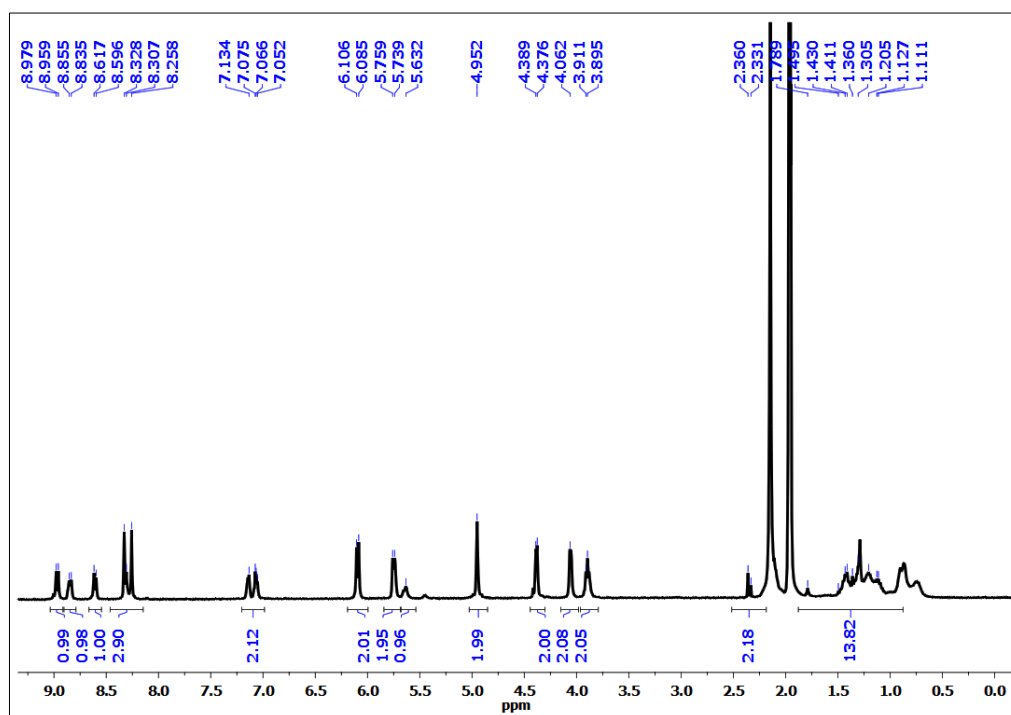

**Figure S16:** <sup>1</sup>H NMR spectrum of [2]Catenane in CD<sub>3</sub>CN (400MHz) at 298 K

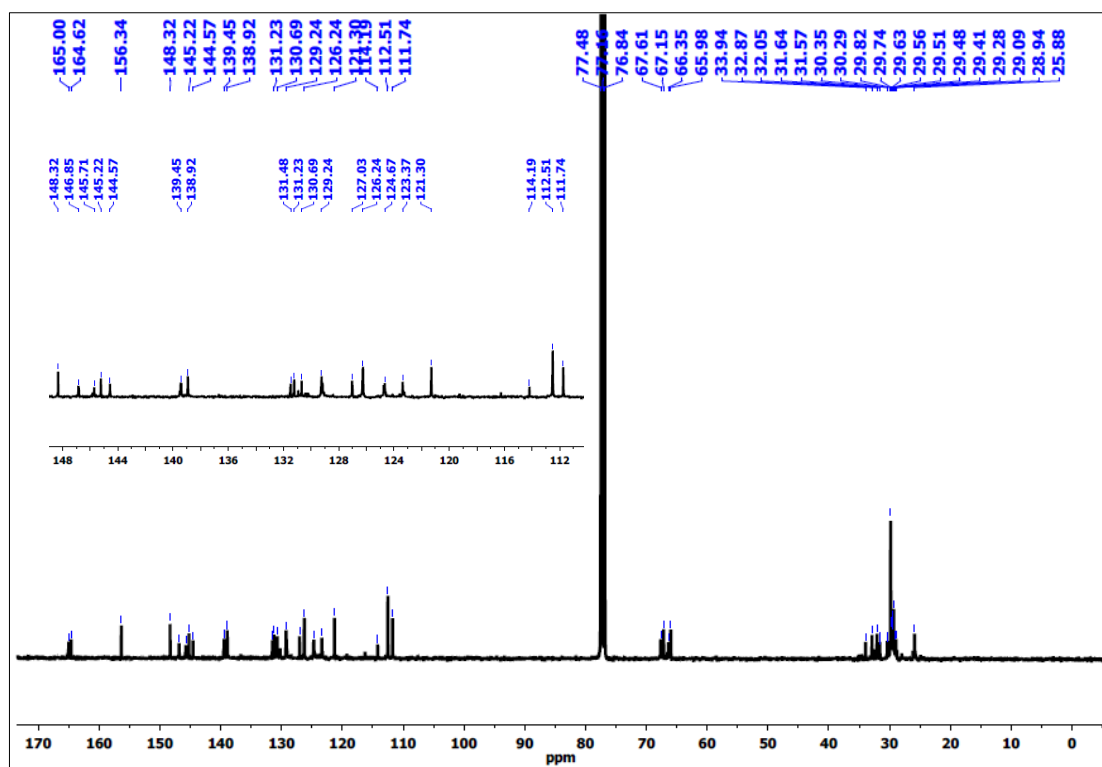

**Figure S17:** <sup>13</sup>C NMR spectrum of [2]Catenane in CDCl<sub>3</sub> (100MHz) at 298 K

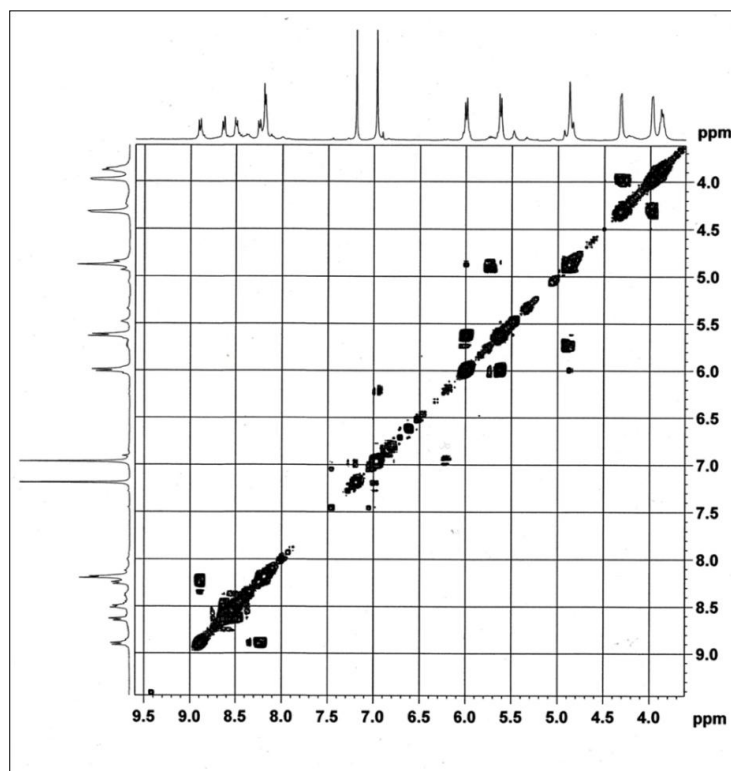

**Figure S18:** <sup>1</sup>H-<sup>1</sup>H COSY spectrum of [2]catenane in CDCl<sub>3</sub> (400 MHz) at 298 K

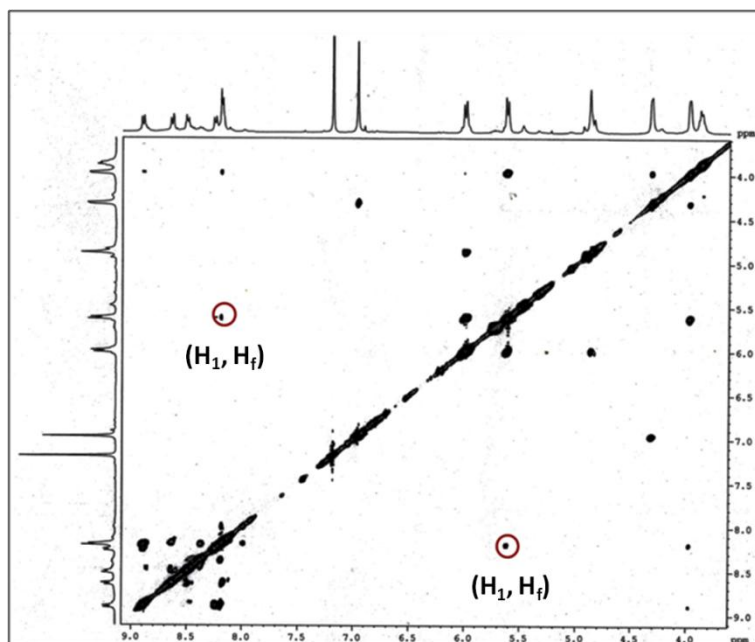

**Figure S19:**  $^1\text{H}$ - $^1\text{H}$  ROESY spectrum of [2]catenane in  $\text{CDCl}_3$  (400 MHz) at 298 K. Assignable through space coupling interactions are highlighted.

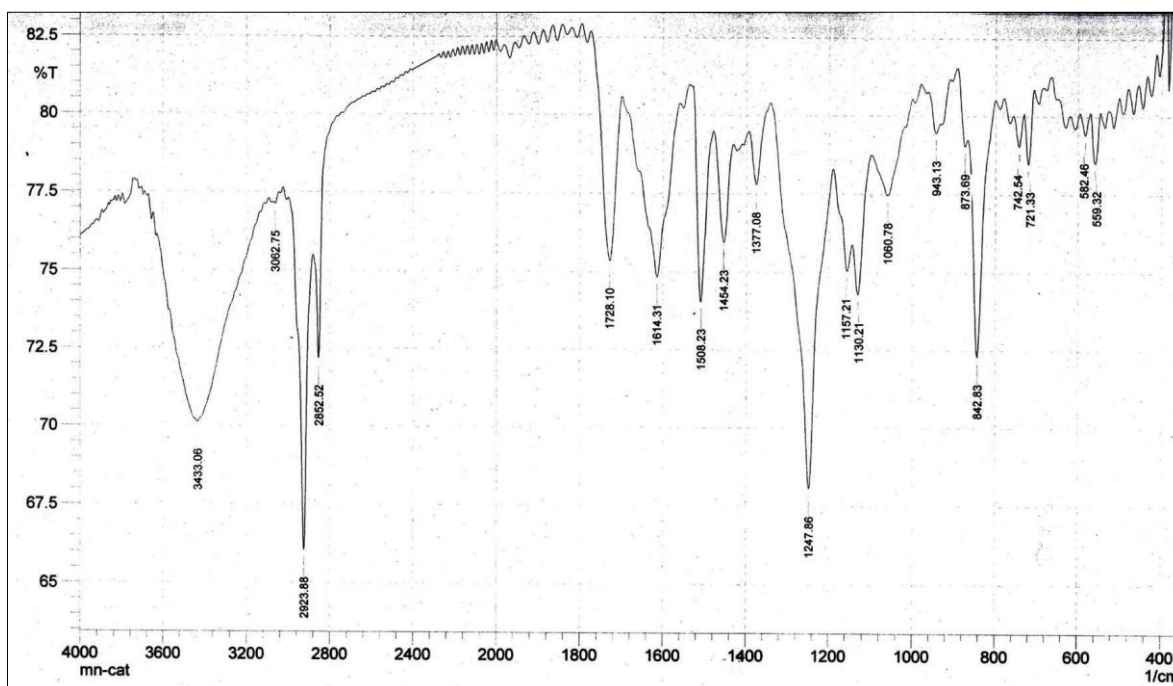

**Figure S20:** FTIR (KBr,  $\nu \text{ cm}^{-1}$ ) spectrum of [2]catenane

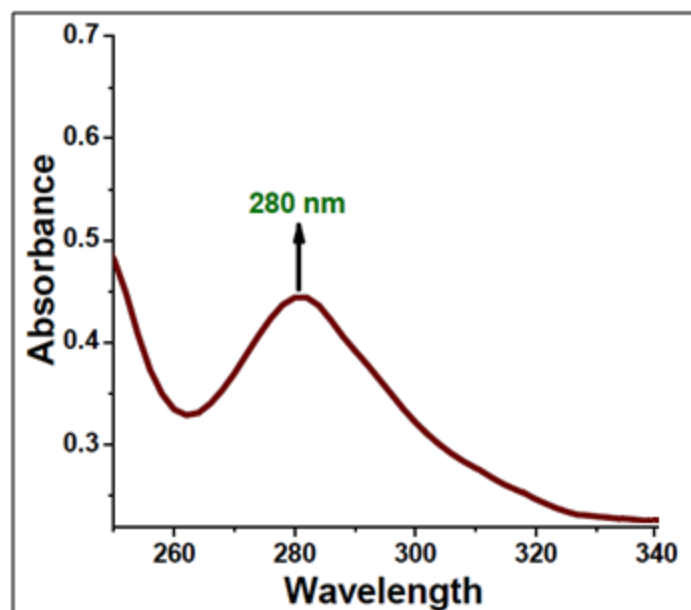

**Figure S21:** Characteristic UV-Vis spectrum of **[2]catenane** ( $2 \times 10^{-5} \text{M}$ ) in  $\text{CH}_3\text{CN}:\text{CH}_3\text{Cl}$  (9:1) medium at 298 K

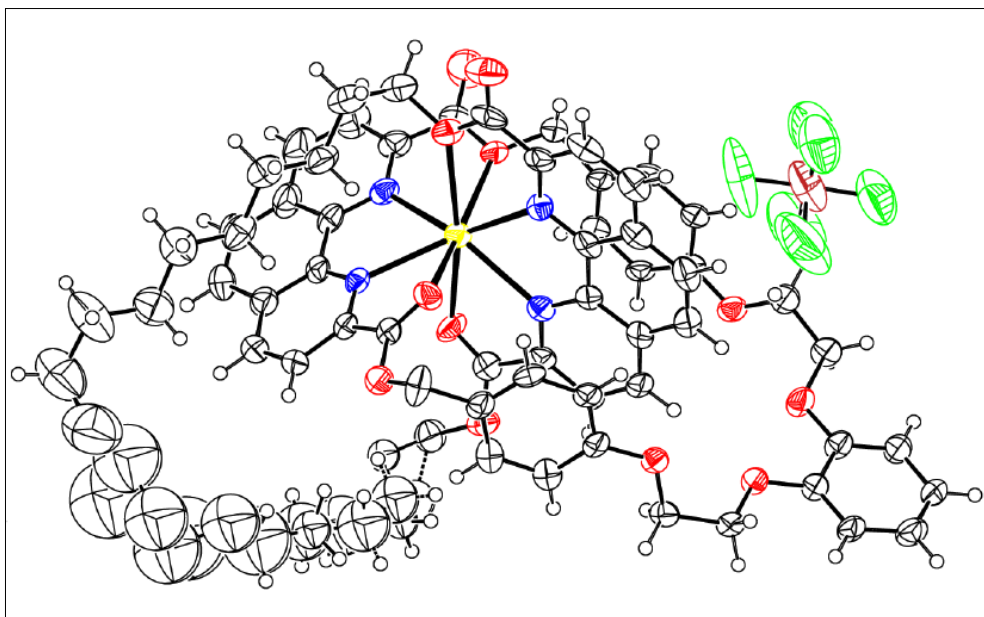

**Figure S22:** Single Crystal X-ray structure of **Na-Catenate** (ellipsoid model using platon version)

**Table 2S:** Crystallographic details of **Na-Catenate**

|                                             |                                      |
|---------------------------------------------|--------------------------------------|
| Compound reference                          | CATN                                 |
| Chemical formula                            | $C_{72}H_{60}N_4NaO_{12} \cdot F_6P$ |
| Formula Mass                                | 1341.20                              |
| Crystal system                              | Triclinic                            |
| $a/\text{\AA}$                              | 9.036(5)                             |
| $b/\text{\AA}$                              | 18.365(10)                           |
| $c/\text{\AA}$                              | 21.014(12)                           |
| $\alpha/^\circ$                             | 88.766(18)                           |
| $\beta/^\circ$                              | 85.77(2)                             |
| $\gamma/^\circ$                             | 87.085(19)                           |
| Unit cell volume/ $\text{\AA}^3$            | 3473(3)                              |
| Temperature/K                               | 107.35                               |
| Space group                                 | $P1$                                 |
| No. of formula units per unit cell, $Z$     | 2                                    |
| No. of reflections measured                 | 19831                                |
| No. of independent reflections              | 10288                                |
| $R_{int}$                                   | 0.1209                               |
| Final $R_I$ values ( $I > 2\sigma(I)$ )     | 0.1218                               |
| Final $wR(F^2)$ values ( $I > 2\sigma(I)$ ) | 0.3045                               |
| Final $R_I$ values (all data)               | 0.2255                               |
| Final $wR(F^2)$ values (all data)           | 0.3667                               |
| Goodness of fit on $F^2$                    | 1.024                                |
| CCDC number                                 | 1871207                              |

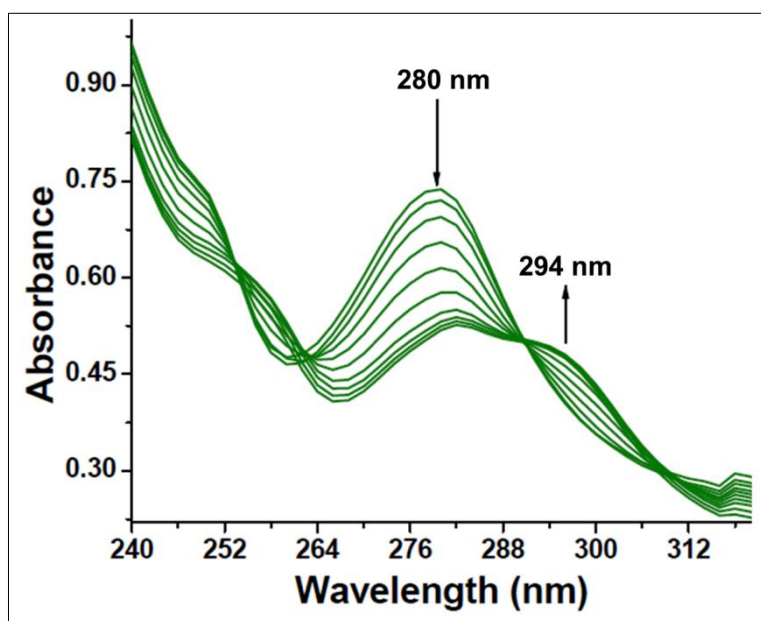

**Figure S23:** UV-Vis titration profile between **CATN** ( $2 \times 10^{-5} \text{M}$ ) and **Eu<sup>3+</sup>** ( $2 \times 10^{-4} \text{M}$ ) in  $\text{CH}_3\text{CN-CHCl}_3$  (9:1) at 298 K

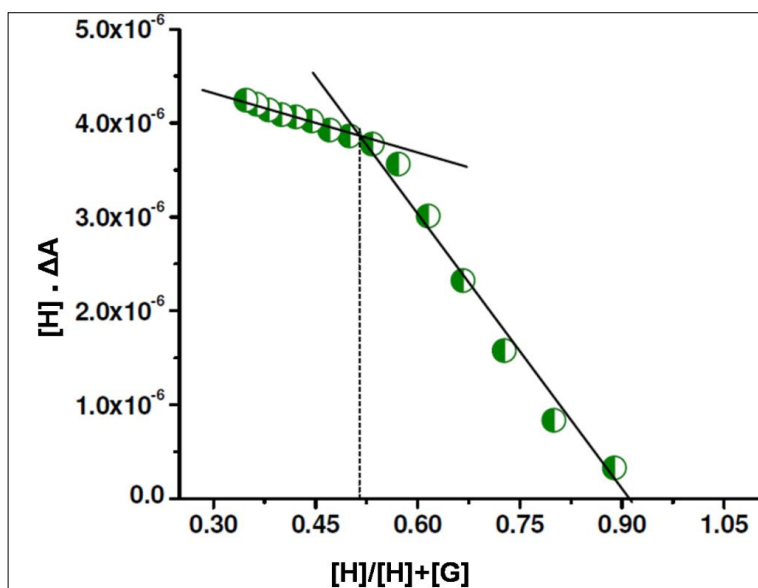

**Figure S24:** Molar ratio plot from UV-Vis titration experiment between **CATN** ( $2 \times 10^{-5} \text{M}$ ) and **Eu<sup>3+</sup>** ( $2 \times 10^{-4} \text{M}$ ) in  $\text{CH}_3\text{CN}:\text{CH}_3\text{Cl}$  (9:1) medium at 298 K

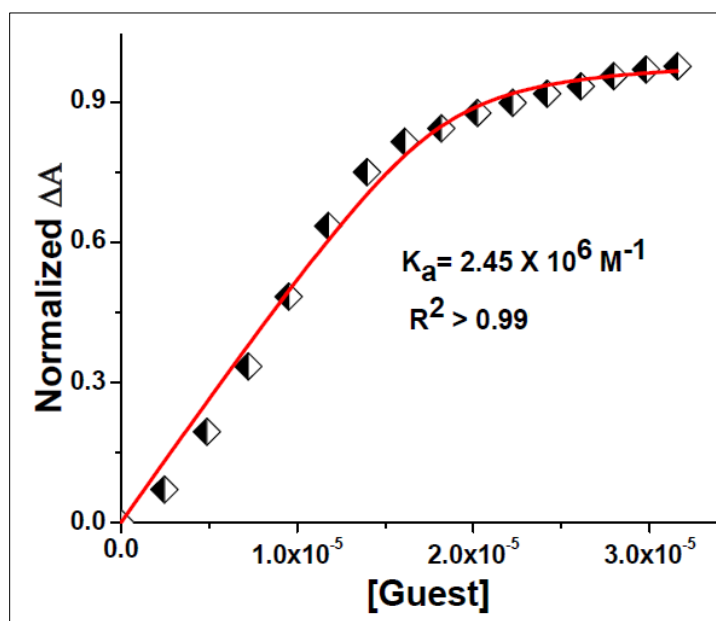

**Figure S25:** Non-linear 1:1 curve fitting plot to determine binding constant for the formation of **CATN** ( $2 \times 10^{-5} \text{M}$ ) -**Eu<sup>3+</sup>** ( $2 \times 10^{-4} \text{M}$ ) complex in  $\text{CH}_3\text{CN}:\text{CH}_3\text{Cl}$  (9:1) medium from UV-Vis titration experiment at 298 K. (Some data points in the figure deviated very marginally from the fitting curve. However, the overall fitting of the data points was reasonably good as clearly evident from the  $R^2$  value of  $>0.99$ .)

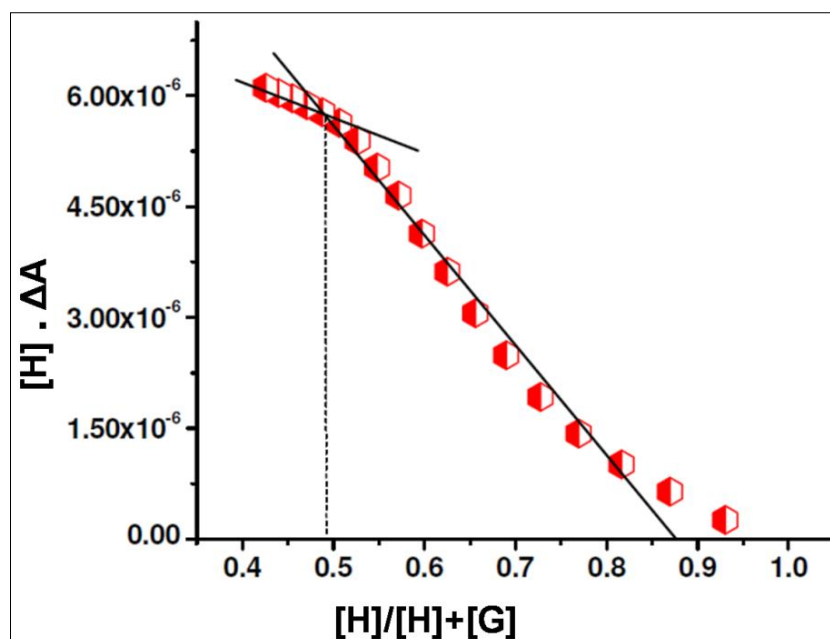

**Figure S26:** Molar ratio plot from UV-Vis titration experiment between **CATN** ( $2 \times 10^{-5} \text{M}$ ) and **Gd<sup>3+</sup>** ( $2 \times 10^{-4} \text{M}$ ) in  $\text{CH}_3\text{CN}:\text{CH}_3\text{Cl}$  (9:1) medium at 298 K

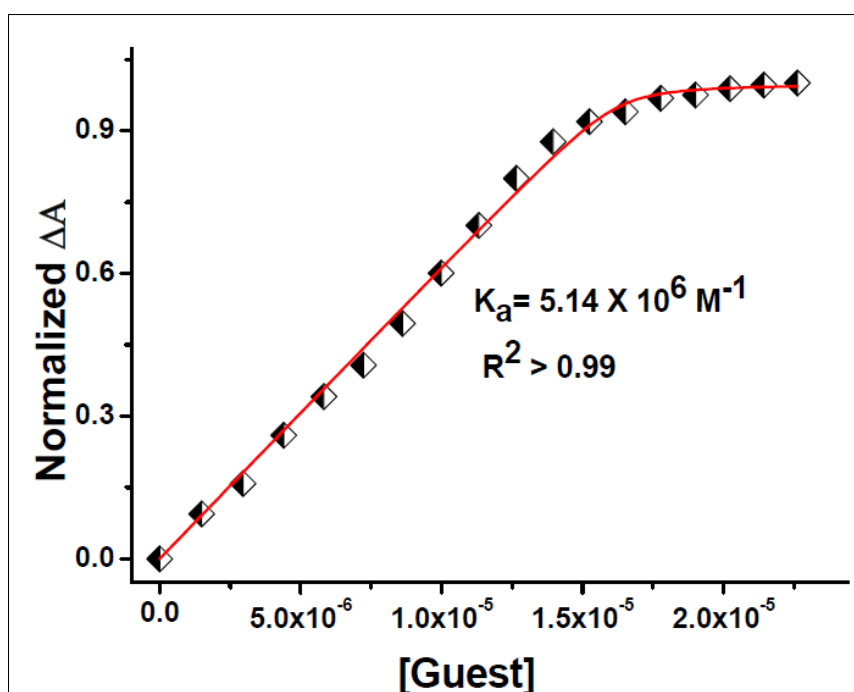

**Figure S27:** Non-linear 1:1 curve fitting plot from UV-Vis titration experiment to determine binding constant for the formation of **CATN** ( $2 \times 10^{-5} \text{M}$ ) -**Gd<sup>3+</sup>** ( $2 \times 10^{-4} \text{M}$ ) complex in  $\text{CH}_3\text{CN}:\text{CH}_3\text{Cl}$  (9:1) medium at 298 K. (Some data points in the figure deviated very marginally from the fitting curve. However, the overall fitting of the data points was reasonably good as clearly evident from the  $R^2$  value of  $>0.99$ .)



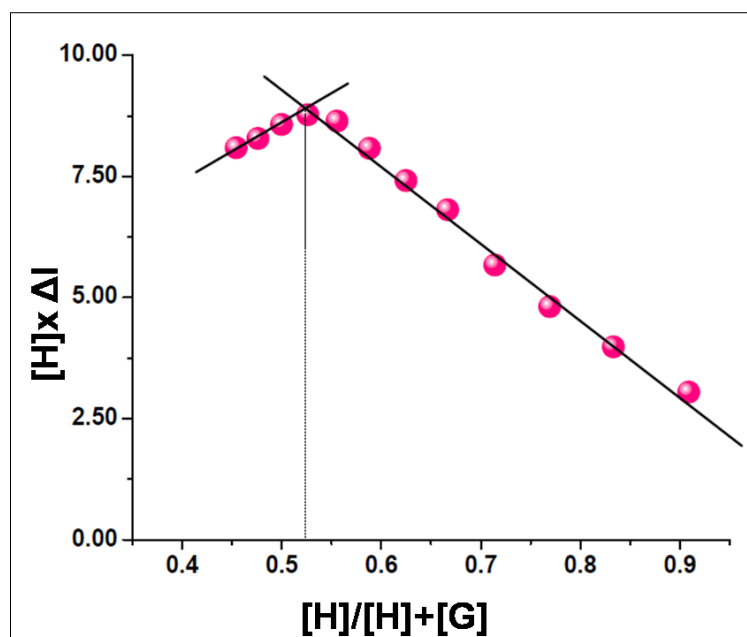

**Figure S28:** Molar ratio plot from PL titration experiment at 613 nm emission wavelength between **CATN** ( $2 \times 10^{-5} \text{ M}$ ) and **Eu<sup>3+</sup>** ( $2 \times 10^{-4} \text{ M}$ ) in  $\text{CH}_3\text{CN}:\text{CH}_3\text{Cl}$  (9:1) medium at 298 K

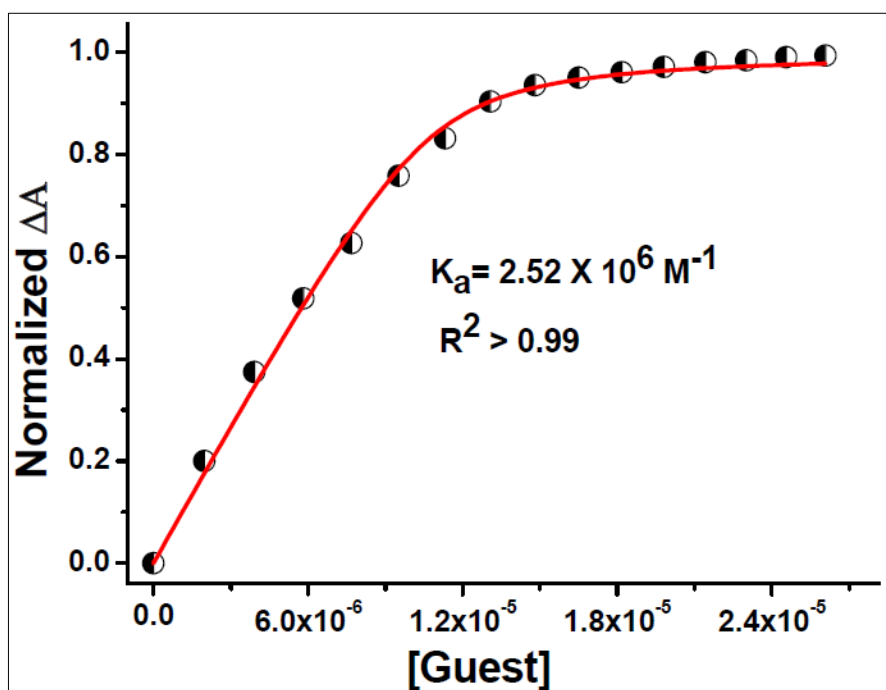

**Figure S29:** Non-linear 1:1 curve fitting plot from PL titration experiment to determine binding constant for the formation of **CATN** ( $2 \times 10^{-5} \text{ M}$ ) -**Eu<sup>3+</sup>** ( $2 \times 10^{-4} \text{ M}$ ) complex in  $\text{CH}_3\text{CN}:\text{CH}_3\text{Cl}$  (9:1) medium at 298 K. (Some data points in the figure deviated very marginally from the fitting curve. However, the overall fitting of the data points was reasonably good as clearly evident from the  $R^2$  value of  $>0.99$ .)

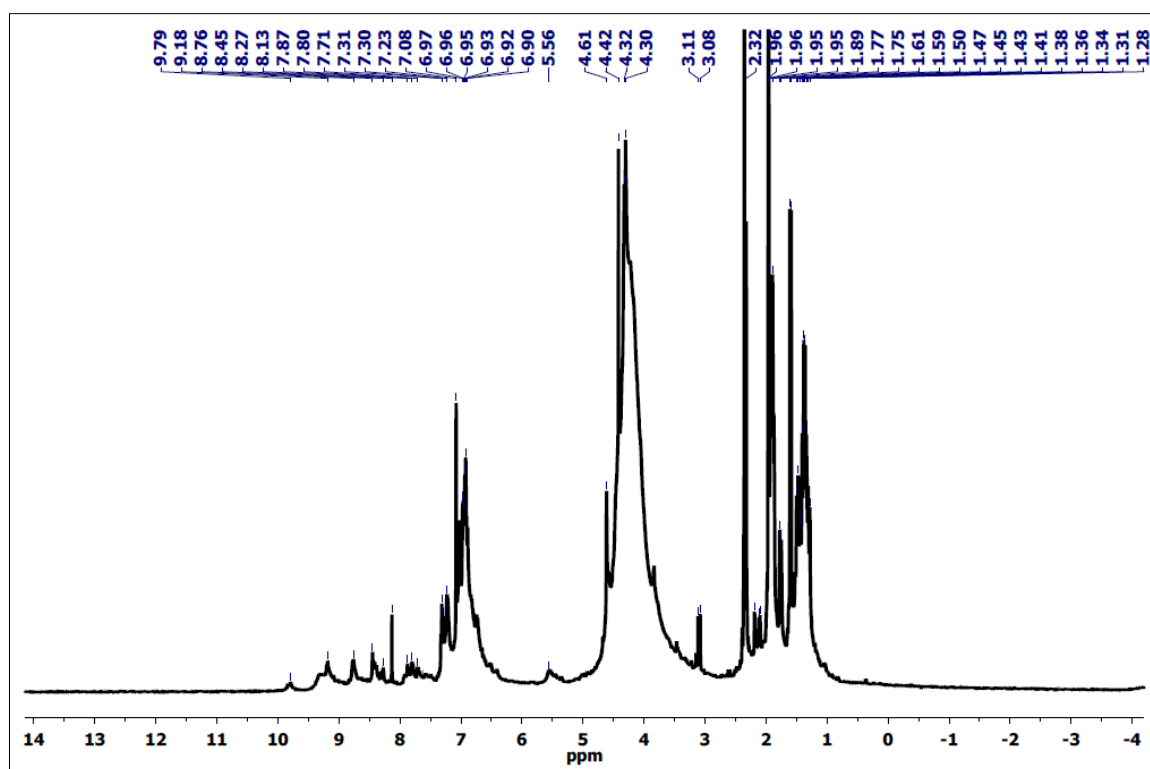

**Figure S30:**  $^1\text{H}$  NMR spectrum of **CATN-Eu<sup>3+</sup>** complex in  $\text{CD}_3\text{CN}$  (500 MHz) at 298 K

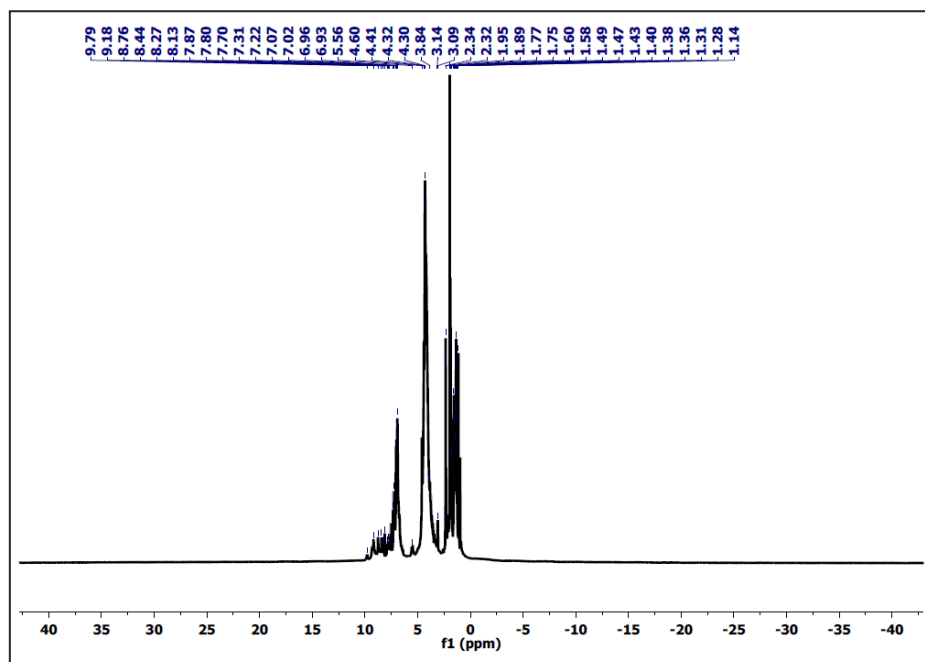

**Figure S30a:**  $^1\text{H}$  NMR spectrum of **CATN-Eu<sup>3+</sup>** complex in  $\text{CD}_3\text{CN}$  (500 MHz) at 298 K in a wide range chemical shift

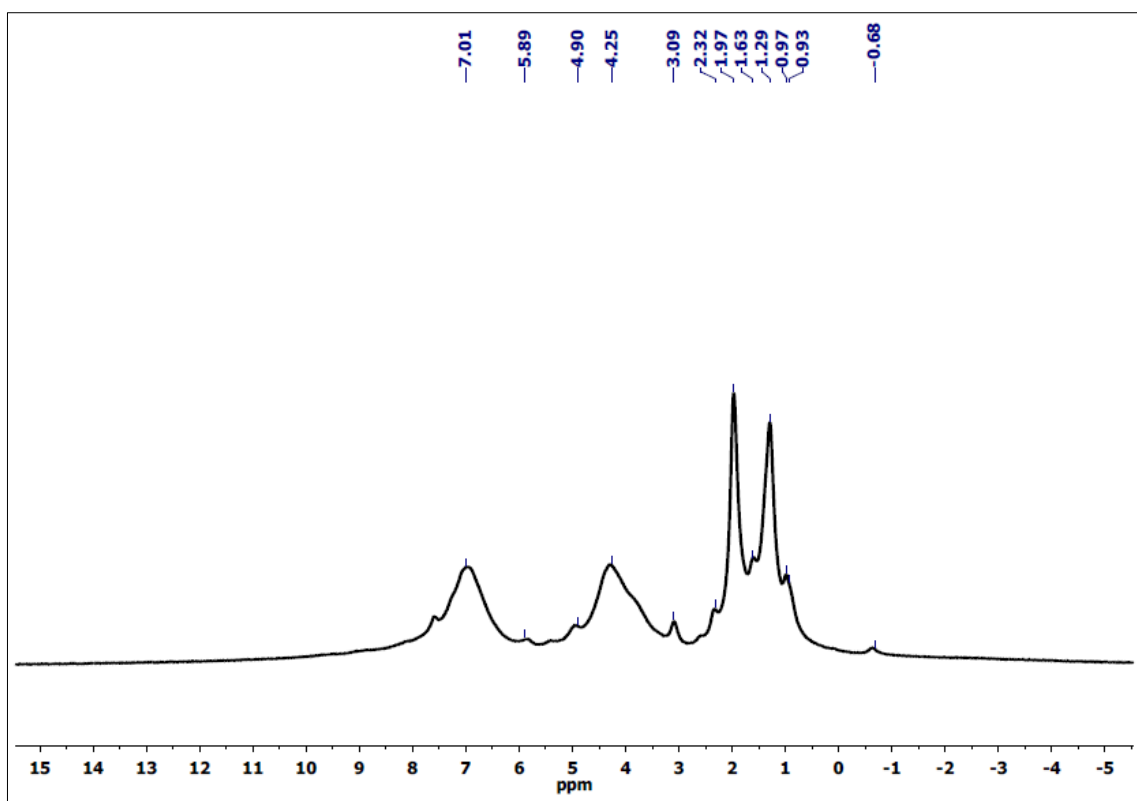

**Figure S31:**  $^1\text{H}$  NMR spectrum of **CATN-Gd<sup>3+</sup>** complex in  $\text{CD}_3\text{CN}$  (500 MHz) at 298 K

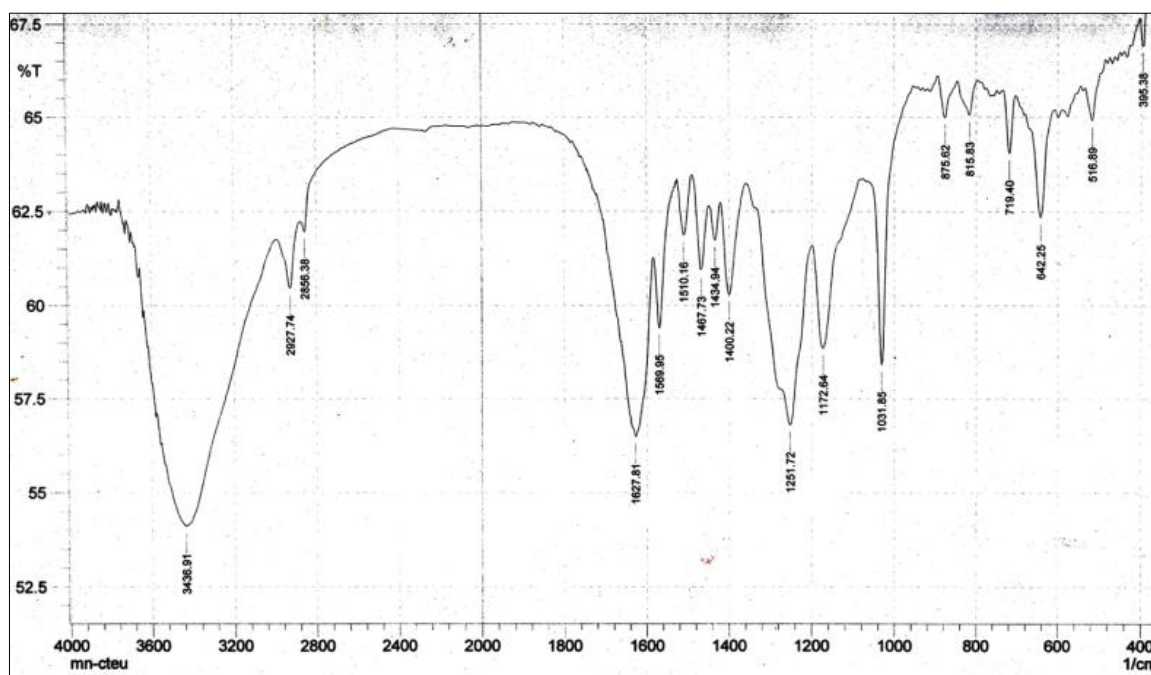

**Figure S32:** FTIR (KBr,  $\text{v cm}^{-1}$ ) spectrum of **CATN-Eu<sup>3+</sup>** complex

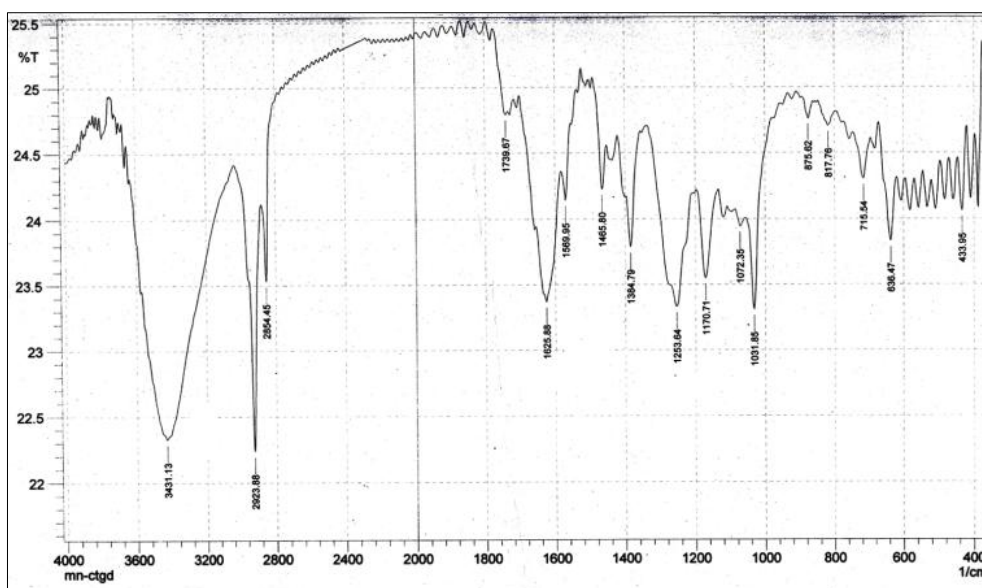

**Figure S33:** FTIR (KBr,  $\text{v cm}^{-1}$ ) spectrum of **CATN-Gd<sup>3+</sup>** complex

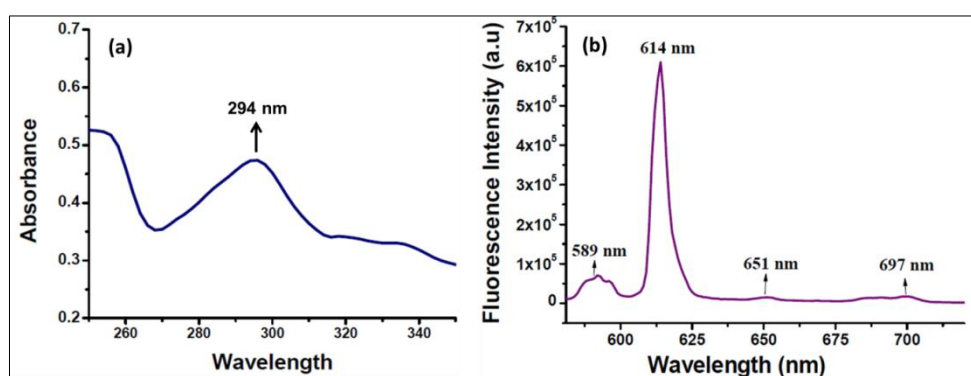

**Figure S34:** Characteristic (a) UV-Vis spectrum and (b) PL spectrum of **CATN-Eu<sup>3+</sup>** ( $2 \times 10^{-5} \text{M}$ ) in  $\text{CH}_3\text{CN}$  medium at 298 K

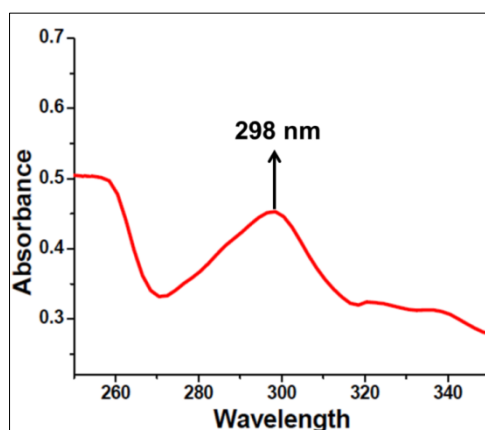

**Figure S35:** Characteristic UV-Vis spectrum of **CATN-Gd<sup>3+</sup>** ( $2 \times 10^{-5} \text{M}$ ) in  $\text{CH}_3\text{CN}:\text{CH}_3\text{Cl}$  (9:1) medium at 298 K

**CATN-Y<sup>3+</sup> complex:** By following the general procedure CATN-Y<sup>3+</sup> complex has been prepared and off white solid Y-catenate was isolated in 52% yield.

CATN-Y<sup>3+</sup> complex (C<sub>75</sub>H<sub>74</sub>F<sub>9</sub>N<sub>4</sub>O<sub>21</sub>S<sub>3</sub>Y, M<sub>w</sub>=1723.49). Anal.calcd for C<sub>75</sub>H<sub>74</sub>F<sub>9</sub>N<sub>4</sub>O<sub>21</sub>S<sub>3</sub>Y: C, 52.27; H, 4.33; N, 3.25. Found C, 51.01; H, 4.52; N, 3.49. HRMS (ESI-MS): C<sub>73</sub>H<sub>74</sub>F<sub>3</sub>N<sub>4</sub>O<sub>15</sub>SY [M- 2CF<sub>3</sub>SO<sub>3</sub>]<sup>2+</sup>: calcd, m/z 712.1936; found, 712.1929. Characteristic λ<sub>max</sub> = 292 nm in (2 x 10<sup>-5</sup>) M CH<sub>3</sub>CN and molar extinction coefficient value (ε) = 2.20 × 10<sup>4</sup> M<sup>-1</sup> cm<sup>-1</sup>. <sup>1</sup>H NMR (400 MHz, CD<sub>3</sub>CN): δ (ppm) 1.25-1.41 (m), 2.31 (d), 3.81 (s), 4.04-4.30 (m), 4.86 (d), 5.29-5.32 (m), 6.71 (d), 6.79 (d), 6.86-7.05 (m), 7.16-7.45 (m), 8.33 (d), 8.43 (s), 8.75 (d), 8.96-9.00 (m), 9.17 (d), 9.25 (bs). IR (KBr, ν cm<sup>-1</sup>): 362.59, 426.24, 516.89, 646.11, 719.40, 765.69, 1047.27, 1174.57, 1234.36, 1261.36, 1400.22, 1467.73, 1508.23, 1573.81, 1620.09, 2927.74, 3394.48.

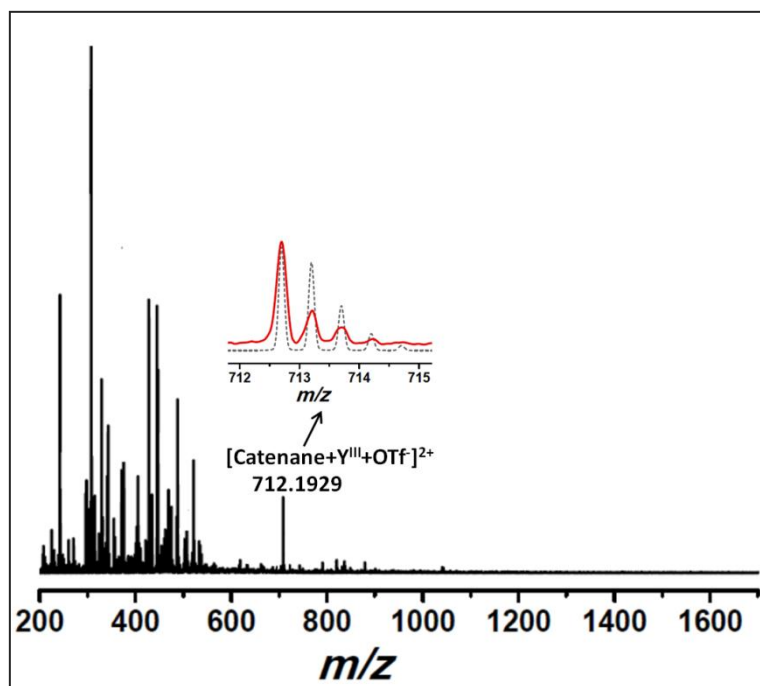

**Figure S36:** ESI-MS of CATN-Y<sup>3+</sup> complex

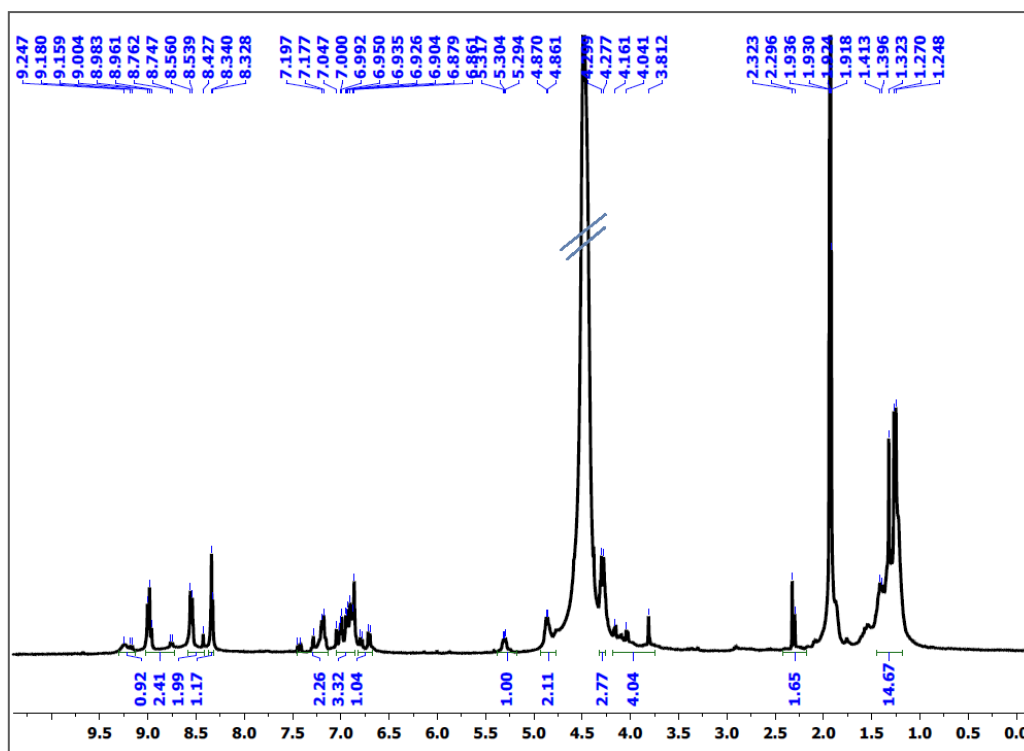

**Figure S37:**  $^1\text{H}$  NMR spectrum of  $\text{CATN-Y}^{3+}$  complex in  $\text{CD}_3\text{CN}$  (400 MHz) at 298 K

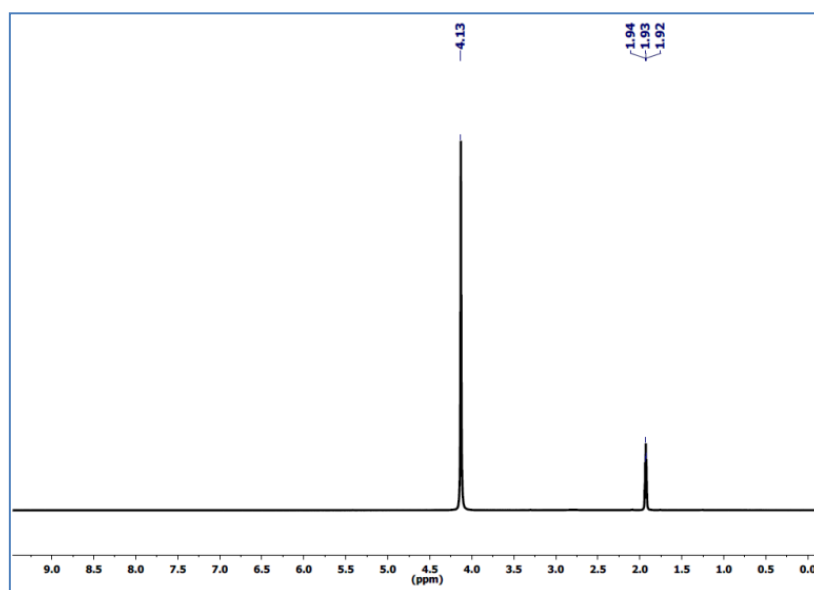

**Figure S37a:**  $^1\text{H}$  NMR spectrum of  $\text{Y}(\text{OTf})_3$  in  $\text{CD}_3\text{CN}$  (400 MHz) at 298K (broad singlet peak appeared at 4.13 ppm may be due to the hygroscopic nature of the salt)

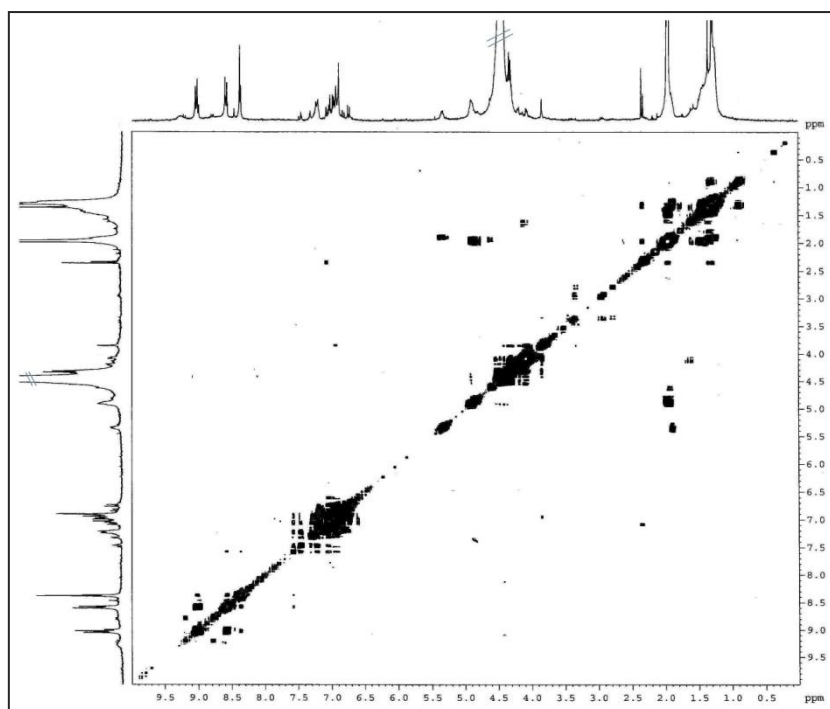

**Figure S38:**  $^1\text{H}$ - $^1\text{H}$  COSY spectrum of  $\text{CATN-Y}^{3+}$  complex in  $\text{CD}_3\text{CN}$  (300 MHz) at 298 K

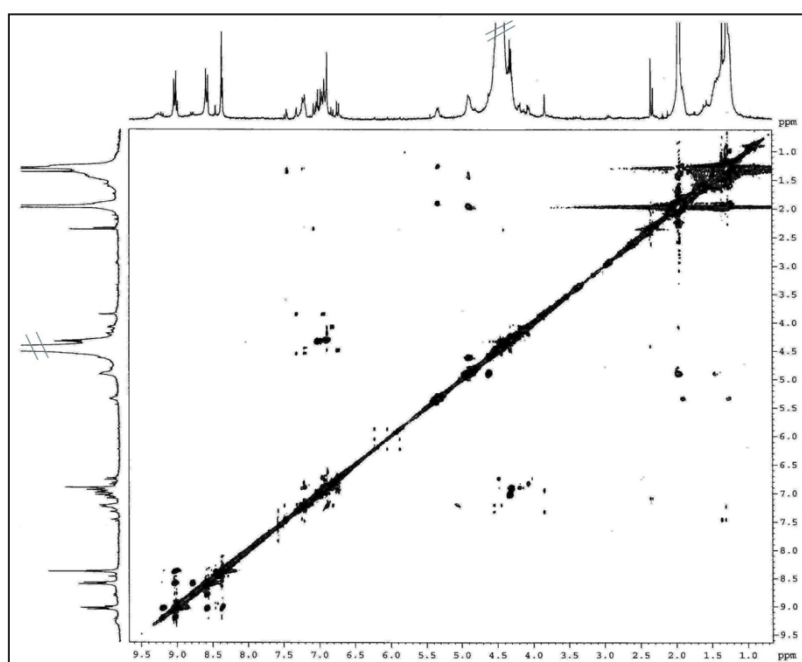

**Figure S39:**  $^1\text{H}$ - $^1\text{H}$  ROESY spectrum of  $\text{CATN-Y}^{3+}$  complex in  $\text{CD}_3\text{CN}$  (300 MHz) at 298 K.

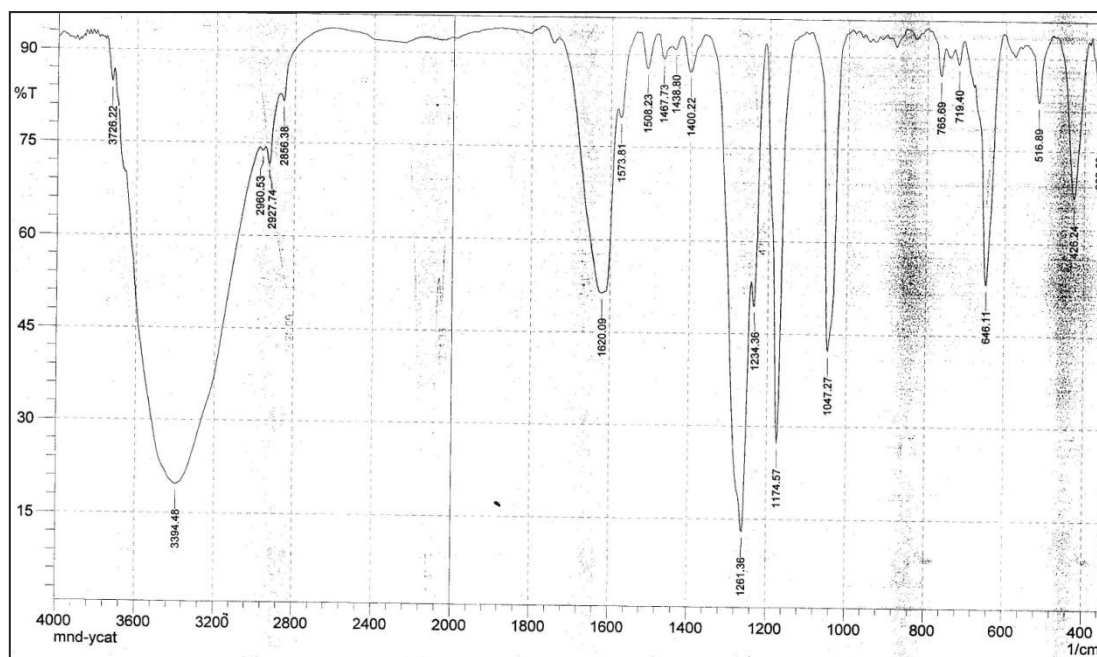

**Figure S40:** FTIR (KBr,  $\nu$   $\text{cm}^{-1}$ ) spectrum of **CATN- $\text{Y}^{3+}$**  complex

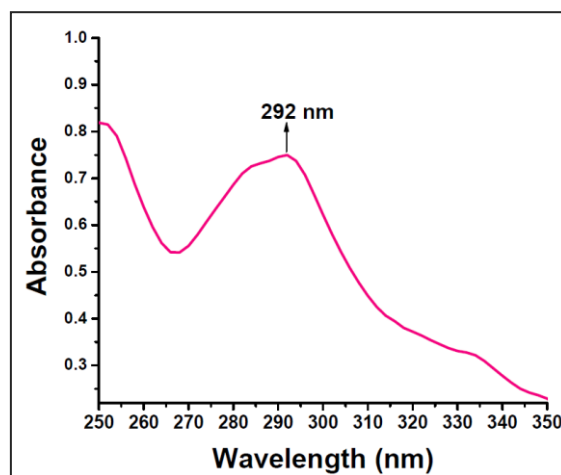

**Figure S41:** Characteristic UV-Vis spectrum of **CATN- $\text{Y}^{3+}$**  ( $2 \times 10^{-5} \text{ M}$ ) in  $\text{CH}_3\text{CN}:\text{CH}_3\text{Cl}$  (9:1) medium at 298 K



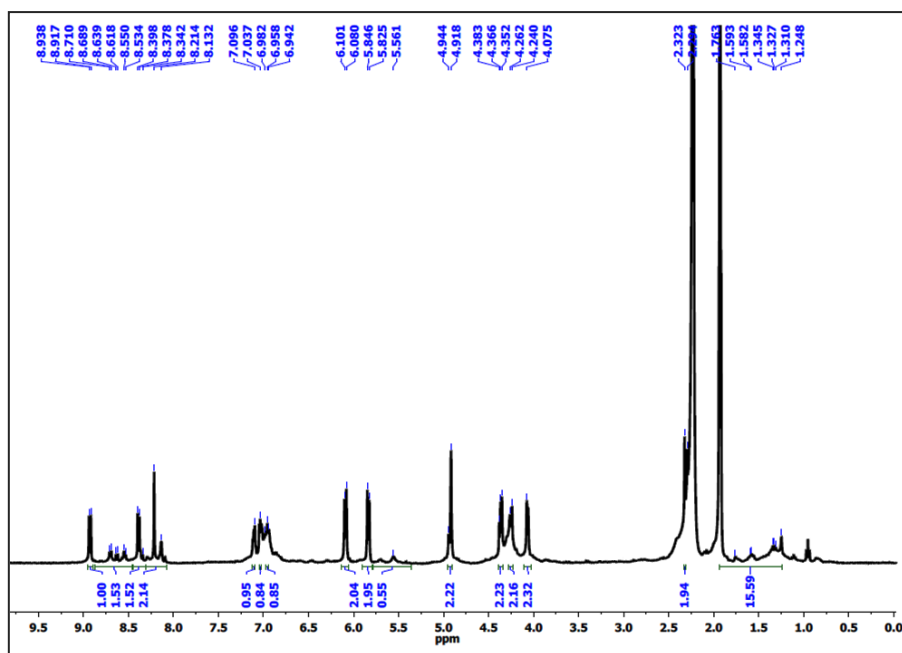

**Figure S42:**  $^1\text{H}$  NMR spectrum of **Na-catenate** in  $\text{CD}_3\text{CN}$  (400 MHz) at 298 K

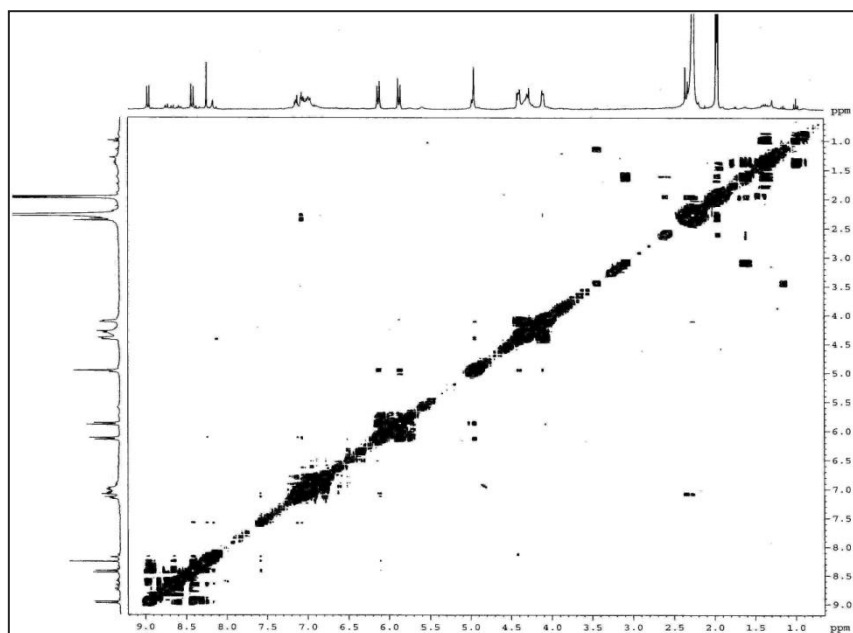

**Figure S43:**  $^1\text{H}$ - $^1\text{H}$  COSY spectrum of **Na-catenate** complex in  $\text{CD}_3\text{CN}$  (300 MHz) at 298 K

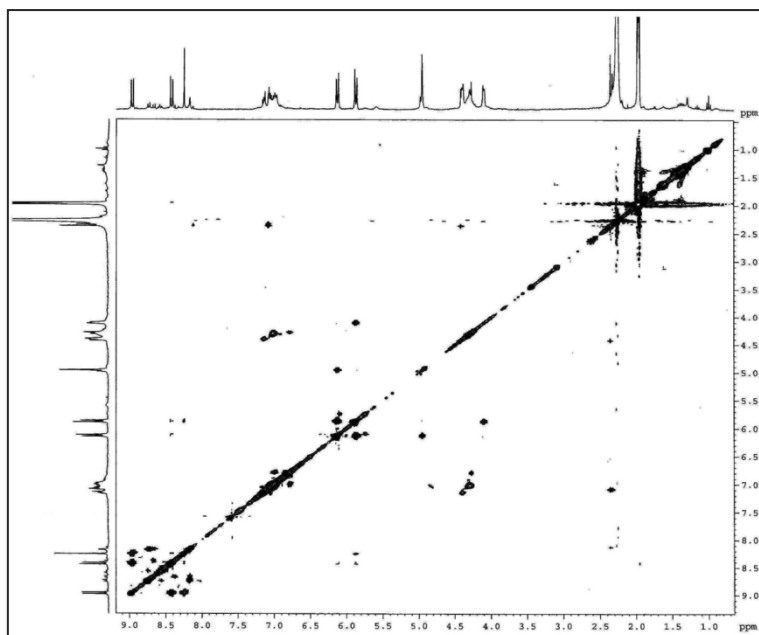

**Figure S44:**  $^1\text{H}$ - $^1\text{H}$  ROESY spectrum of **Na-catenate** complex in  $\text{CD}_3\text{CN}$  (300 MHz) at 298 K.

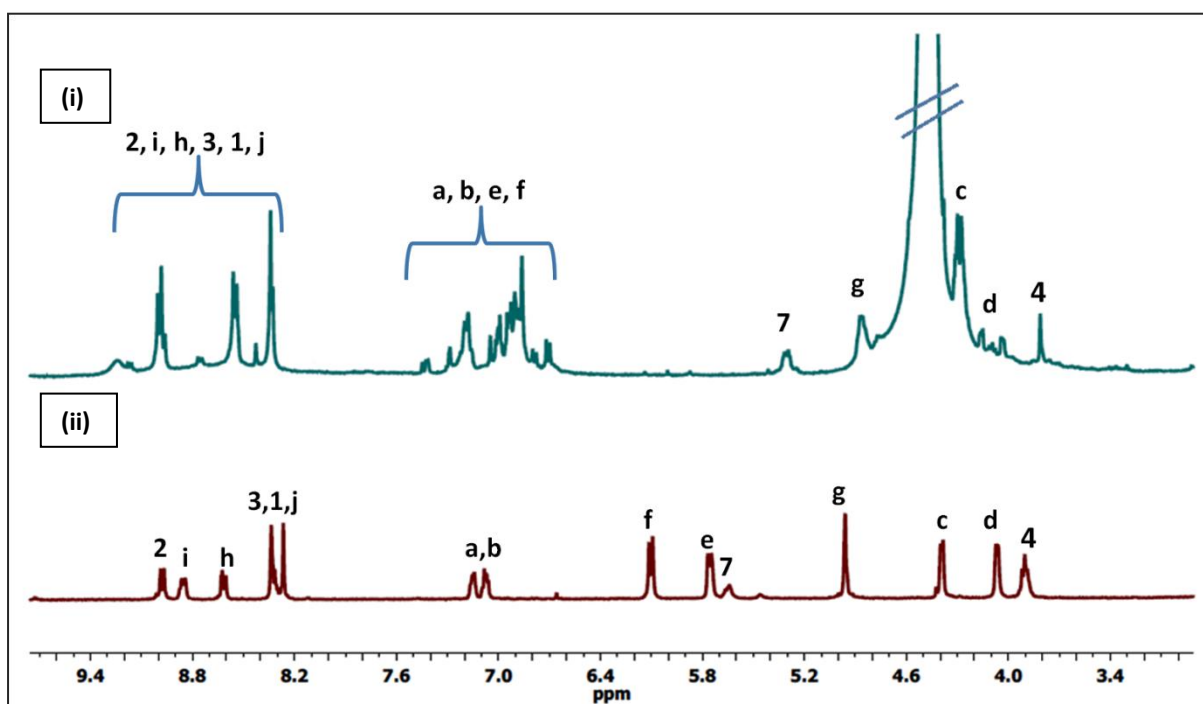

**Figure S45:** Comparative  $^1\text{H}$  NMR analysis between (i) **Y-catenate** and (ii) **[2]catenane** in  $\text{CD}_3\text{CN}$  (400 MHz) at 298 K.

## **References**

1. S. Santra, S. Mukherjee, S. Bej, S. Saha and P. Ghosh, *Dalton Trans.*, 2015, **44**, 15198.
2. J. Dehaudt, N. J. Williams, I. A. Shkrob, H. Luo and S. Dai, *Dalton Trans.*, 2016, **45**, 11624.
3. M. Nandi, S. Santra, B. Akhuli and P. Ghosh, *Dalton Trans.*, 2017, **46**, 7421.
4. G. M. Sheldrick, *SAINT and XPREP, version 5.1*, Siemens Industrial Automation Inc., Madison, WI, 1995.
5. G. M. Sheldrick, *SHELXS97. Program for Crystal Structure Solution and Refinement*, University of Göttingen, Göttingen, 1997.
6. G. M. Sheldrick, *SHELXL v. 2014, Program for Crystal Structure Refinement*, University of Göttingen, 2014.
7. G. M. Sheldrick, *SADABS*, Empirical Absorption Correction Program, University of Göttingen, Göttingen, Germany, 1997.
8. A. L. Spek, *PLATON-97*, University of Utrecht, Utrecht, the Netherlands, 1997.
9. Mercury, *version 3.7, supplied with Cambridge Structural Database*, CCDC, Cambridge, U.K., 2003–2004.
